# Supplementary material for: Closed-to-Open-Shell Molecular Sensing Enables Highly Selective Detection of Chemical Warfare Agents
Source: Research Square preprint supplement (doi:10.21203/rs.3.rs-8614974/v1), 2026-01-28
Supplement: Supplementary file 1 [file 6242feb2568893a6a4798353.docx]

Supplementary Information

**Closed-to-Open-Shell Molecular Sensing Enables Highly Selective Detection of Chemical Warfare Agents**

Yunhui Meng1, Shuqi Zou1, Mingyang Wu1, Xiaobai Li1*, Kun Song1, Lijia Zhang1, Yuling Yang1, Alim Abdurahman2*, Hongwei Ma1,3*, Geyu Lu2*

1 College of Chemistry, Chemical Engineering and Resource Utilization, Northeast Forestry University, Harbin 150040, China.

2 State Key Laboratory of Integrated Optoelectronics, JLU Region, College of Electronic Science and Engineering Jilin University, Changchun 130012, P. R. China.

3 Heilongjiang Key Laboratory of Complex Traits and Protein Machines in Organisms, Northeast Forestry University, Harbin 150040, China.

**Contents**

**Supplementary Figures**

[**Supplementary Fig. 1** Synthetic route of DTE-3PCz, DTE-3NCz. 4](#_Toc219412678)

[**Supplementary Fig. 2** 1H NMR spectrum of DTE-2Cl in CDCl3. 5](#_Toc219412679)

[**Supplementary Fig. 3** 1H NMR spectrum of DTE-3PCz in CDCl3. 5](#_Toc219412680)

[**Supplementary Fig. 4** 1H NMR spectrum of DTE-3NCz in CDCl3. 6](#_Toc219412681)

[**Supplementary Fig. 5** 13C NMR spectrum of DTE-2Cl in CDCl3. 6](#_Toc219412682)

[**Supplementary Fig. 6** 13C NMR spectrum of DTE-3PCz in CDCl3. 7](#_Toc219412683)

[**Supplementary Fig. 7** 13C NMR spectrum of DTE-3NCz in CDCl3. 7](#_Toc219412684)

[**Supplementary Fig. 8** Liquid chromatography-mass spectrometry of DTE-2Cl. 8](#_Toc219412685)

[**Supplementary Fig. 9** Liquid chromatography-mass spectrometry of DTE-3PCz. 8](#_Toc219412686)

[**Supplementary Fig. 10** Liquid chromatography-mass spectrometry of DTE-3NCz. 9](#_Toc219412687)

[**Supplementary Fig. 11** Photochemical properties. (a) UV-vis absorption spectra and (b) Fluorescence spectra of DTE-3NCz (1.0×10-5 M in dichloromethane (DCM)) upon UV irradiation at room temperature. c Color shifts in the CIE 1931 diagram of a solution of DTE-3NCz (1.0×10-5 M in DCM) under different times of UV irradiation. d EPR spectra before and after UV irradiation (in toluene). 9](#_Toc219412688)

[**Supplementary Fig. 12** UV-vis absorption spectra of DTE-3PCz (a) and DTE-3NCz (b) (1.0×10-5 M in DCM) after UV irradiation and subsequent addition of 10 equiv. of TEMPO. 10](#_Toc219412689)

[**Supplementary Fig. 13** High-performance liquid chromatography analysis of DTE-3PCz (1.0×10-5 M in acetonitrile) before and after UV irradiation (365 nm). Reaction of DTE-3PCz radical molecules with TEMPO (10 equiv.). 10](#_Toc219412690)

[**Supplementary Fig. 14** Fluorescence spectra of DTE-3PCz (a) and DTE-3NCz (b) (1.0×10-5 M in DCM) upon addition of HCl. c The quenching efficiency of DTE-3NCz (1.0×10-5 M in DCM) under UV light irradiation after addition of 10 equiv. of DCP, HCl, and other interfering substances. 11](#_Toc219412691)

[**Supplementary Fig. 15** Fluorescence spectra of DTE-3PCz (1.0×10-5 M in DCM) upon addition of(a) BTC, (c) 2-CEES. Linear relationship between quenching efficiency of DTE-3PCz solution upon addition of (b) BTC, (d) 2-CEES. Error bars stand for standard deviation. 11](#_Toc219412692)

[**Supplementary Fig. 16** The photoluminescence quantum yield (PLQY) of DTE-3PCz (1.0×10-5 M)in (a) original, (b) DCP, (c) HCl, (d) 2-CEES and (e) BTC DCM solution. 12](#_Toc219412693)

[**Supplementary Fig. 17** UV-vis spectra of DTE-3PCz and DTE-3NCz (1.0×10-5 M in DCM) upon addition of DCP (a, b), HCl (c, d). 12](#_Toc219412694)

[**Supplementary Fig. 18** Liquid chromatography-mass spectrometry of DTE-3PCz (HCl) radical. 13](#_Toc219412695)

[**Supplementary Fig. 19** Liquid chromatography-mass spectrometry of DTE-3PCz (DCP) radical. 13](#_Toc219412696)

[**Supplementary Fig. 20** 1H NMR of DTE-3PCz in CDCl3 solution under UV irradiation after addition of 10 equiv. of HCl. 14](#_Toc219412697)

[**Supplementary Fig. 21** 1H NMR of DTE-3PCz in CDCl3 solution under UV irradiation after addition of 10 equiv. of DCP. 14](#_Toc219412698)

[**Supplementary Fig. 22** Normalized absorption (blue line) and PL spectra (green line) of DTE-3PCz (1.0×10-5 M in DCM) upon addition of DCP (a) and HCl (b). Normalized PL spectra of DTE-3PCz (c) at different excitation wavelengths and normalized excitation spectra of DTE-3PCz (d) at different emission wavelengths. 15](#_Toc219412699)

[**Supplementary Fig. 23** ESP plots of DTE-3NCz before and after addition of DCP. 15](#_Toc219412700)

[**Supplementary Fig. 24** Electronic spin density distributions (up), electronic density distributions of the frontier molecular orbitals (down) of DTE-3PCz radical (HCl) calculated at the theoretical level of uM062X/6-31 g(d, p). 16](#_Toc219412701)

[**Supplementary Fig. 25** Orbital transitions and electron-hole distribution corresponding to the DTE-3PCz radical (HCl). 16](#_Toc219412702)

[**Supplementary Fig. 26** Electronic spin density distributions (up), electronic density distributions of the frontier molecular orbitals (down) of DTE-3PCz radical (DCP) calculated at the theoretical level of uM062X/6-31 g(d, p). 17](#_Toc219412703)

[**Supplementary Fig. 27** Electronic spin density distributions (up), electronic density distributions of the frontier molecular orbitals (down) of DTE-3NCz radical (HCl) calculated at the theoretical level of uM062X/6-31 g(d, p). 17](#_Toc219412704)

[**Supplementary Fig. 28** Orbital transitions and electron-hole distribution corresponding to the DTE-3NCz radical (HCl). 18](#_Toc219412705)

[**Supplementary Fig. 29** Electronic spin density distributions (up), electronic density distributions of the frontier molecular orbitals (down) of DTE-3NCz radical (DCP) calculated at the theoretical level of uM062X/6-31 g(d, p). 18](#_Toc219412706)

[**Supplementary Fig. 30** Orbital transitions and electron-hole distribution corresponding to the DTE-3NCz radical (DCP). 19](#_Toc219412707)

[**Supplementary Fig. 31** The photographs of DTE-3PCz (1.0×10-5 M in DCM) placed at 298 K and 77 K. 19](#_Toc219412708)

[**Supplementary Fig. 32** Scanning electron microscope image of DTE-3PCz film. 20](#_Toc219412709)

[**Supplementary Fig. 33** Schematic diagram of the adsorption testing system for DTE-3PCz films. The section enclosed by dashed lines can be removed for weighing. 20](#_Toc219412710)

[**Supplementary Fig. 34** Particle diffusion model. 21](#_Toc219412711)

[**Supplementary Fig. 35** Cell viability by WST-8 method. 21](#_Toc219412712)

Supplementary Tables

[**Supplementary Table 1** Luminescence performance data of DTE-3PCz (1.0×10-5 M) in original, DCP, HCl, 2-CEES and BTC DCM (1.0×10-5 M) solution. 21](#_Toc219396060)

[**Supplementary Table 2** Calculated wavelength (λ) and oscillator strength (ƒ) for absorption of DTE-3PCz (HCl) radical with uM062X functional at the basis set level of 6-31 g(d, p). 22](#_Toc219396061)

[**Supplementary Table 3** Calculated wavelength (λ) and oscillator strength (ƒ) for absorption of DTE-3PCz (DCP) radical with uM062X functional at the basis set level of 6-31 g(d, p). 22](#_Toc219396062)

Supplementary Figures


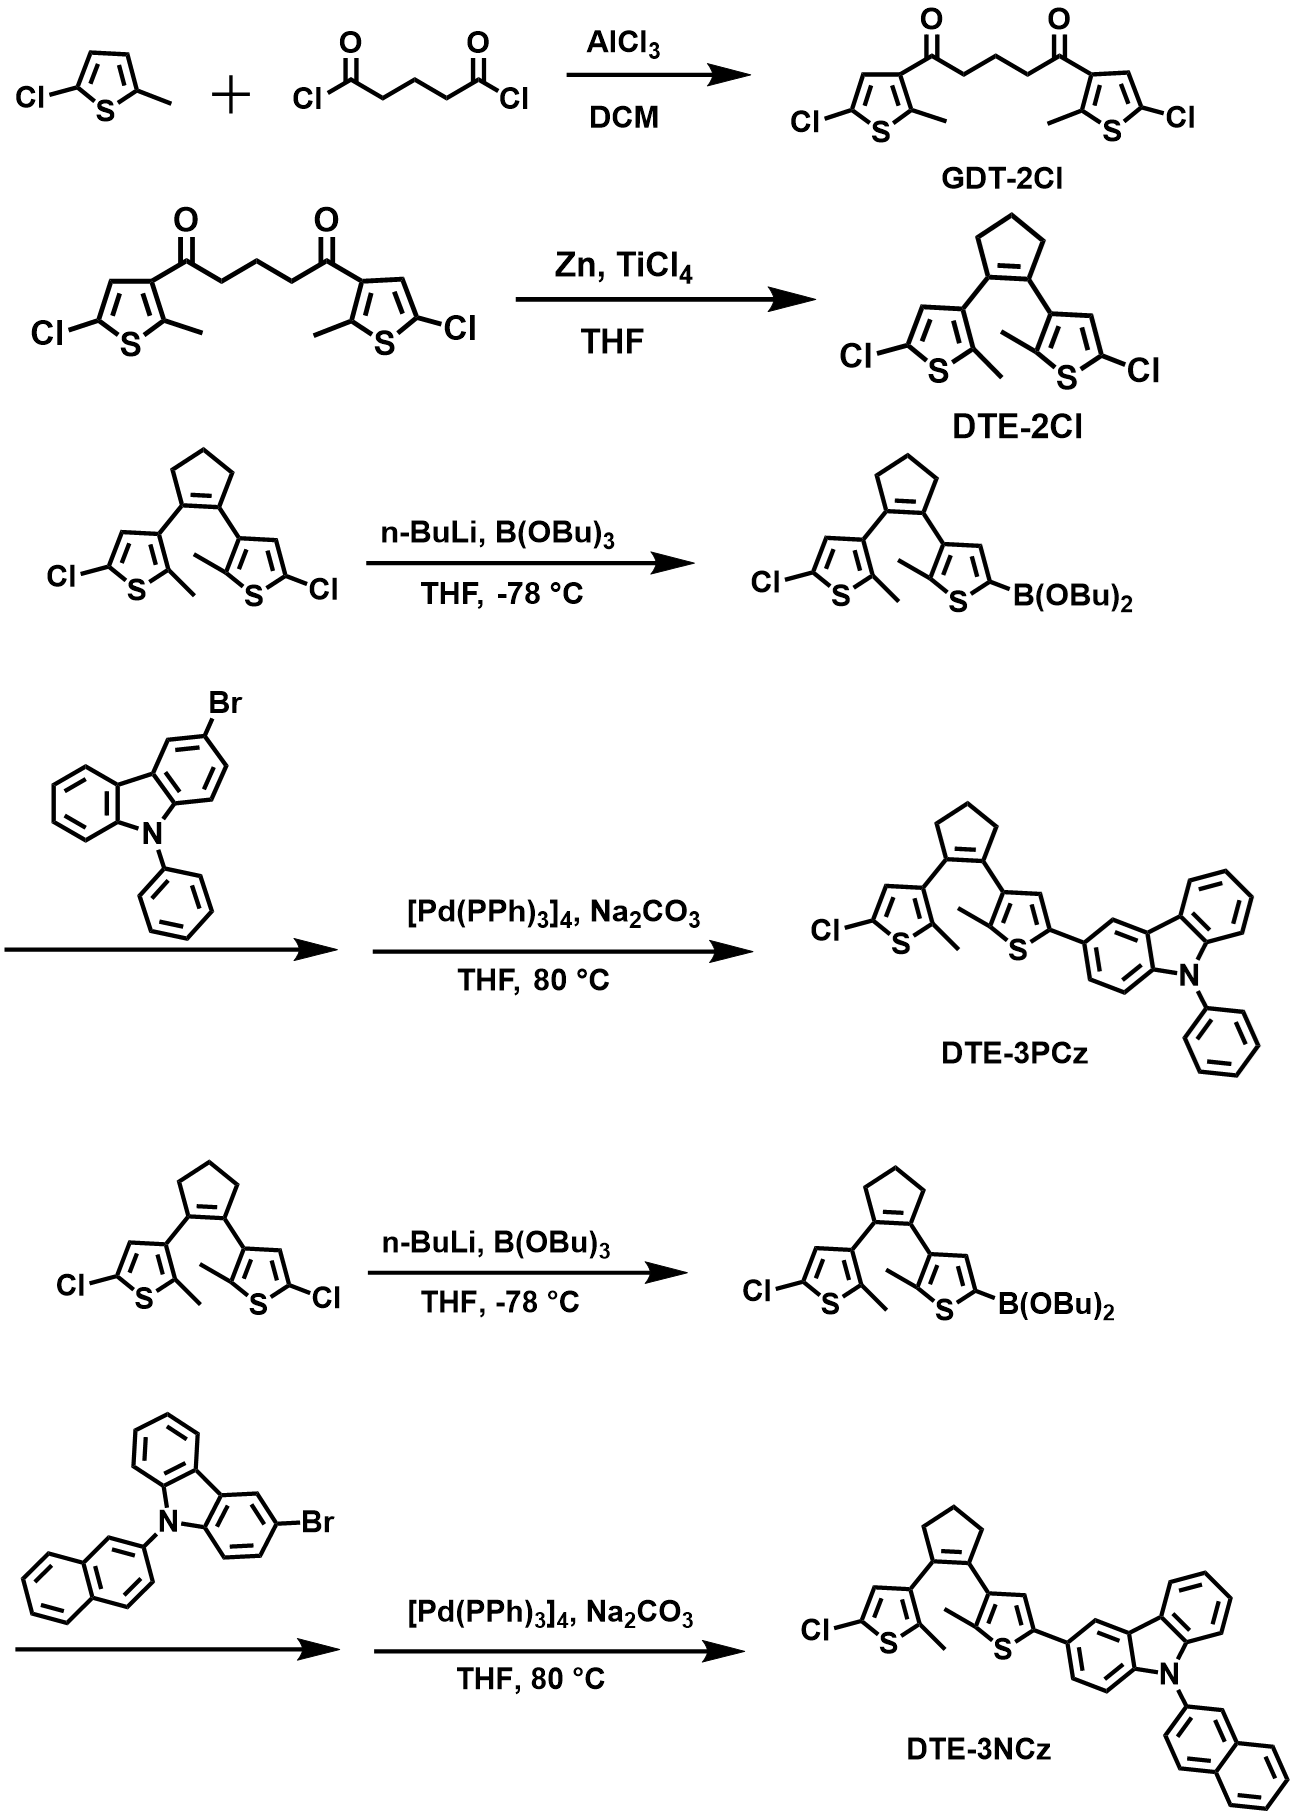


**Supplementary Fig. 1** Synthetic route of DTE-3PCz, DTE-3NCz.


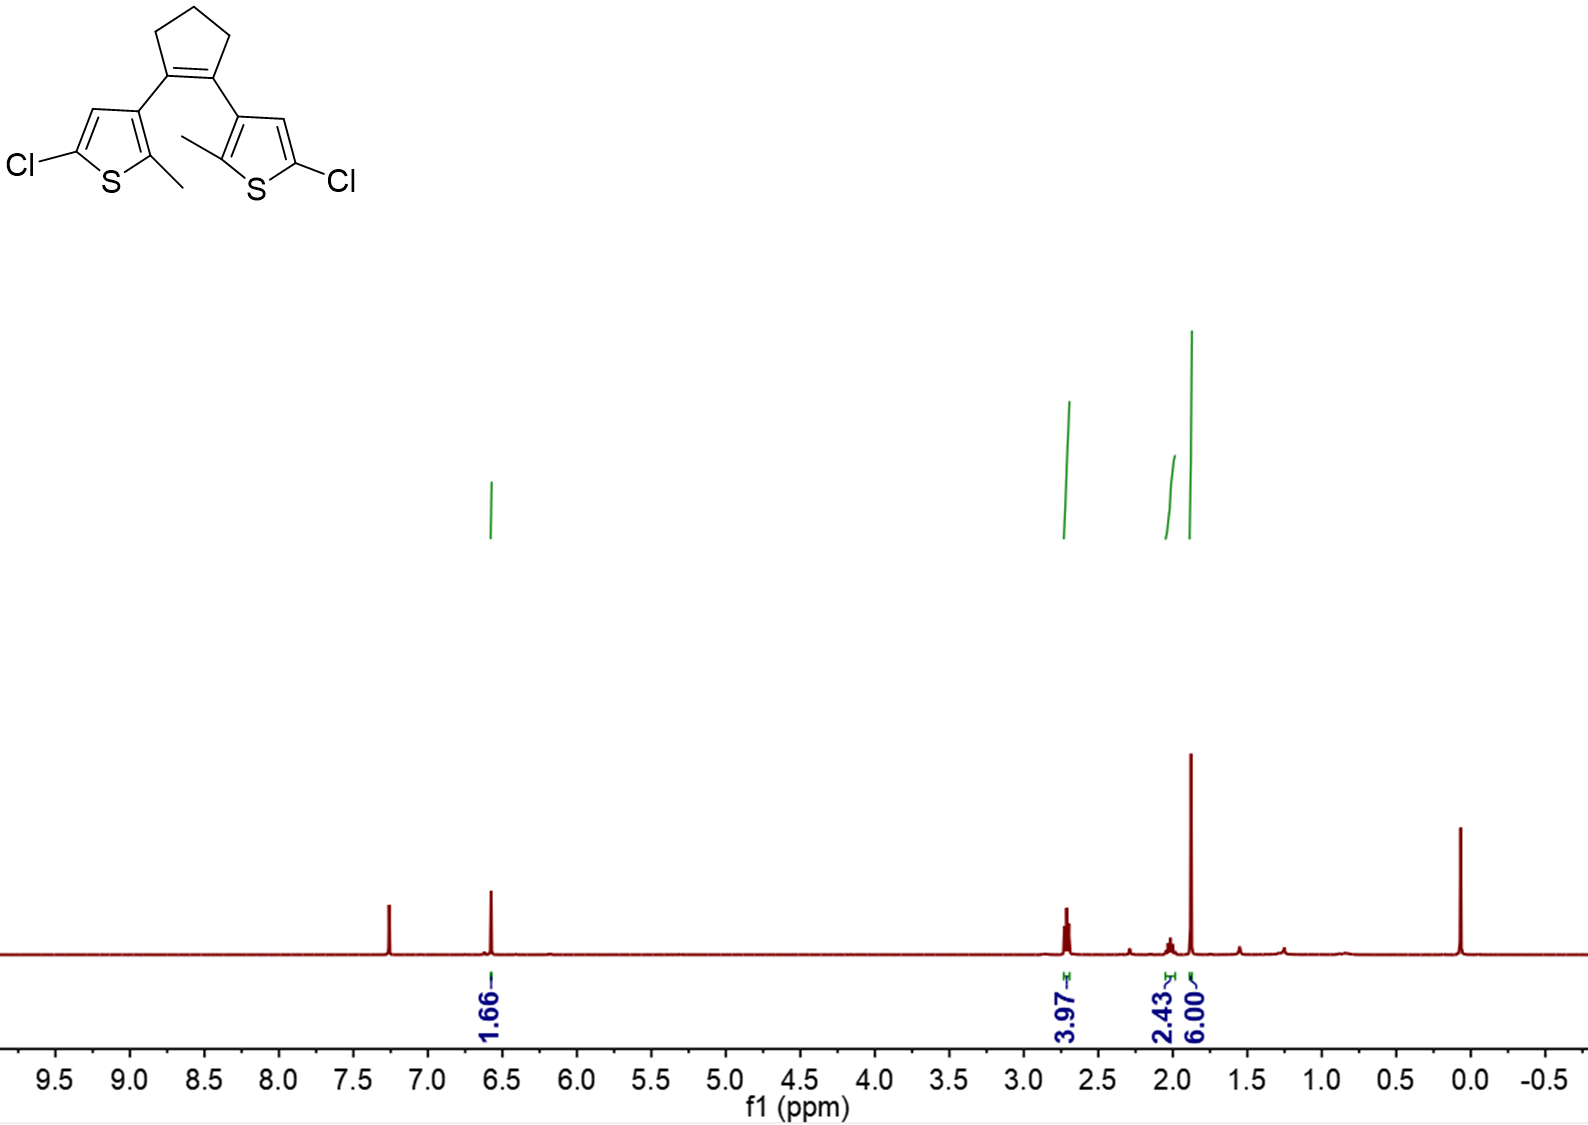


**Supplementary Fig. 2** 1H NMR spectrum of DTE-2Cl in CDCl3.


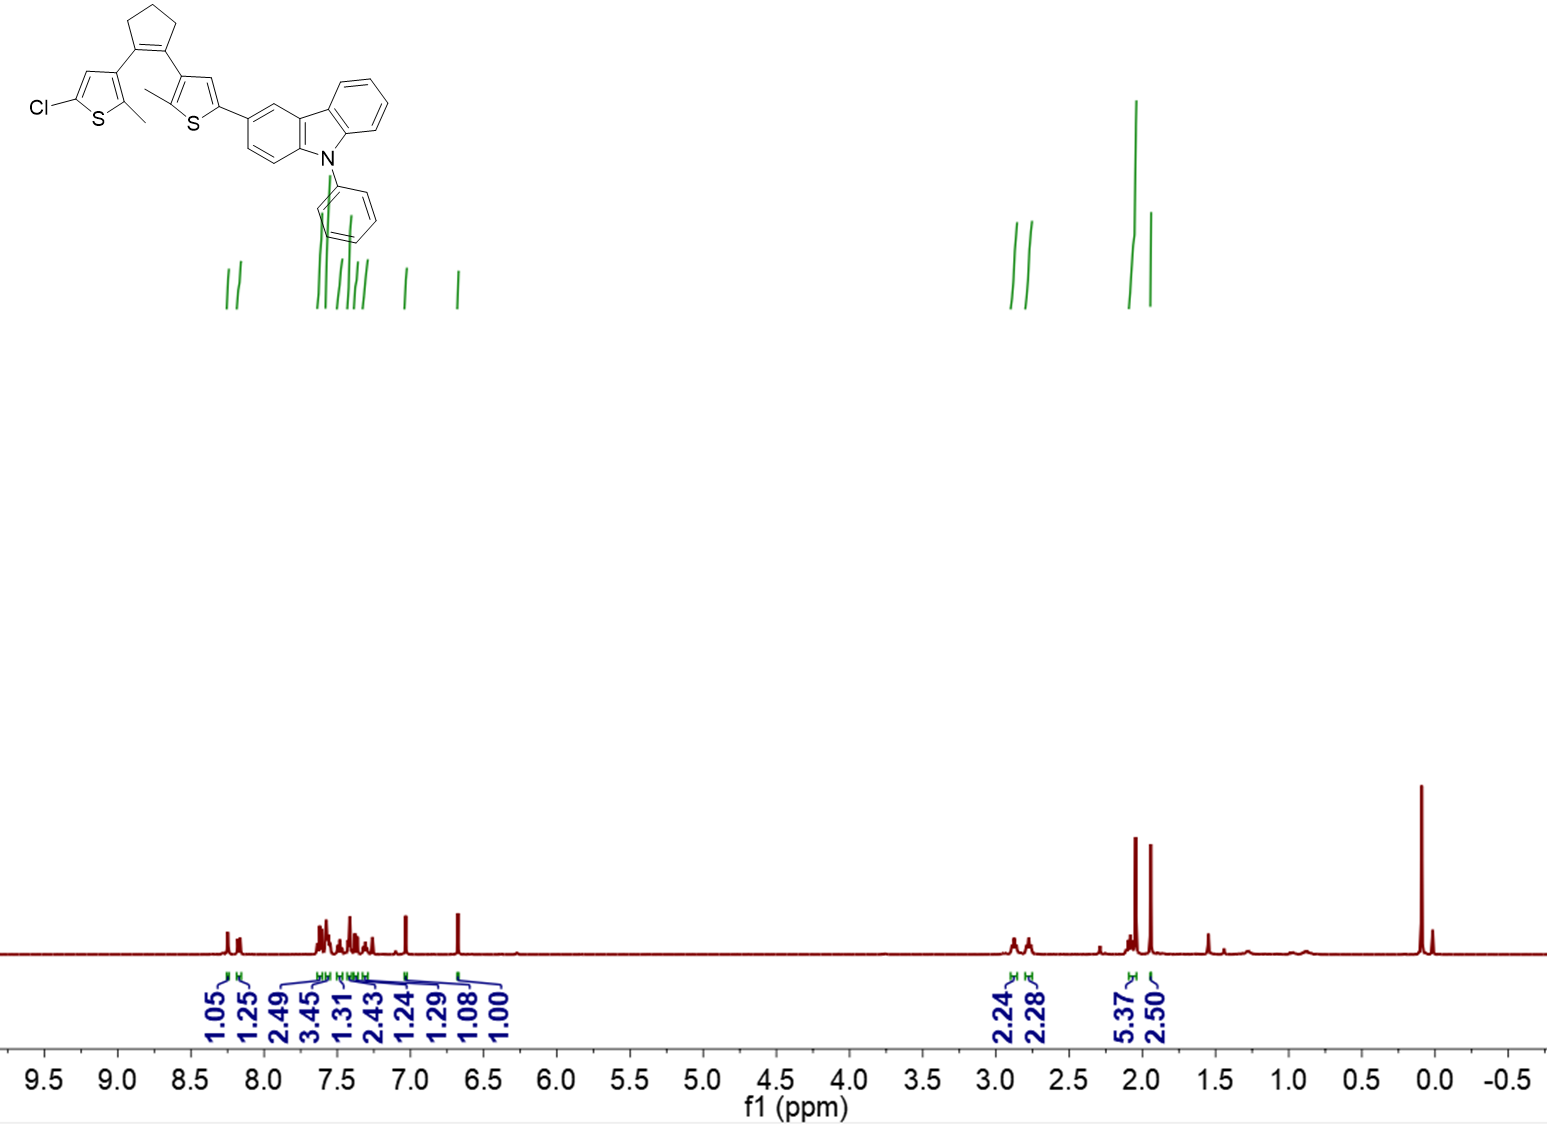


**Supplementary Fig. 3** 1H NMR spectrum of DTE-3PCz in CDCl3.


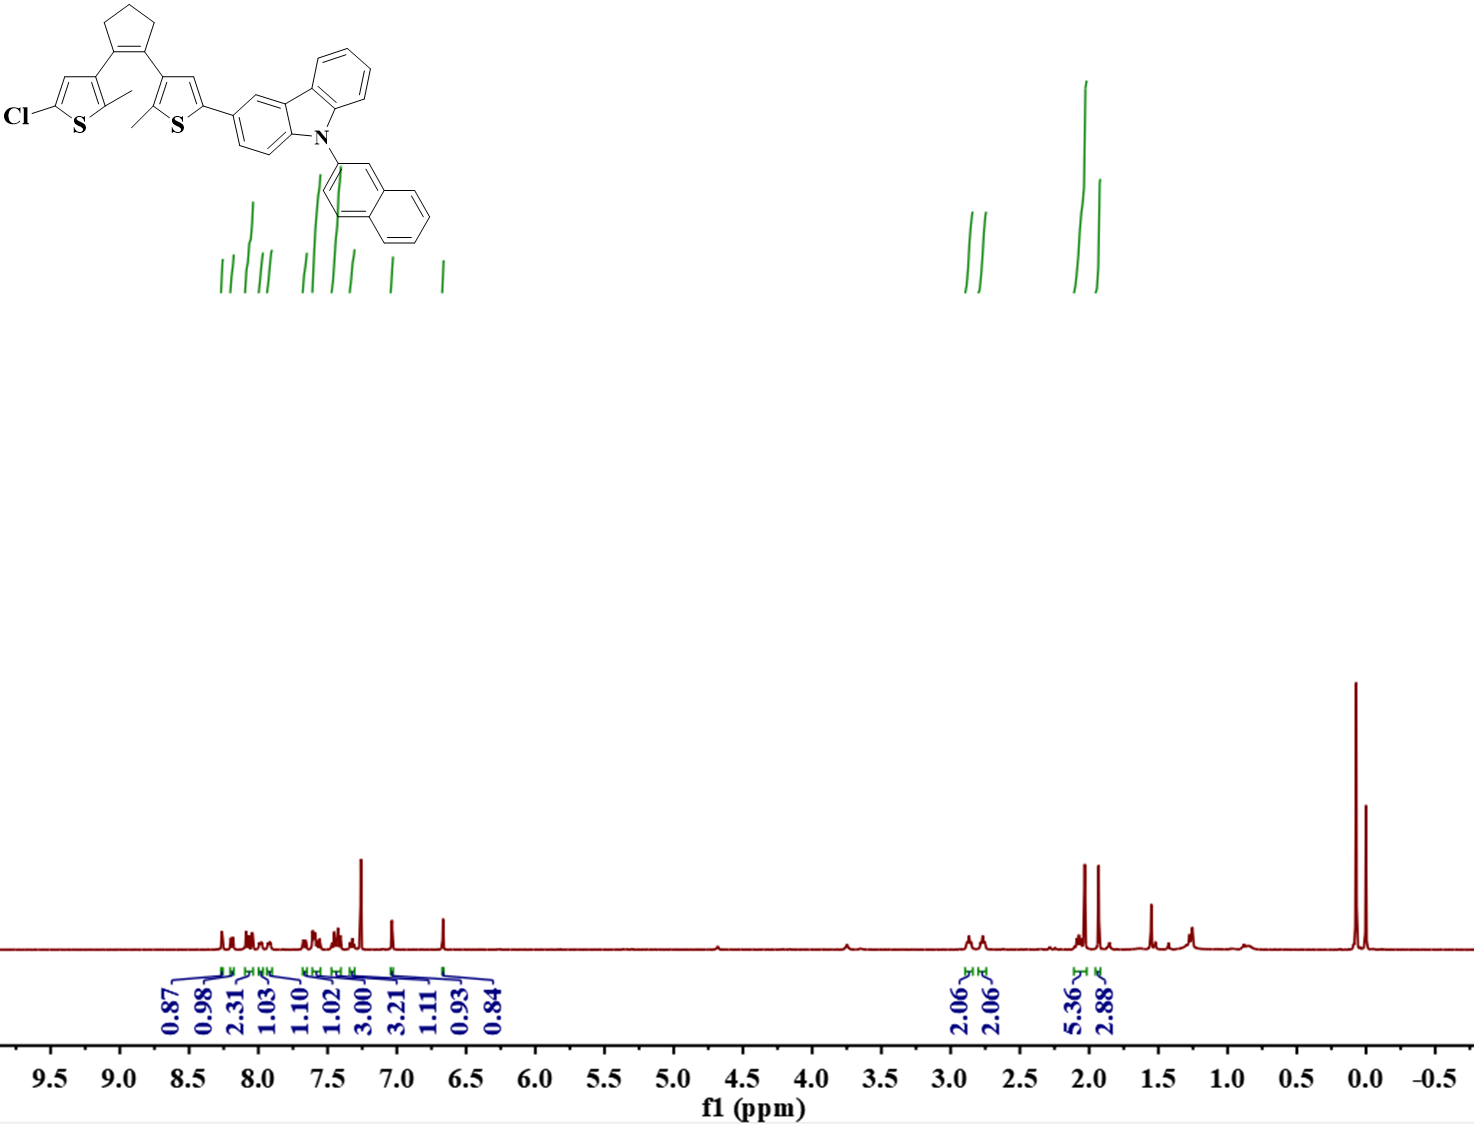


**Supplementary Fig. 4** 1H NMR spectrum of DTE-3NCz in CDCl3.


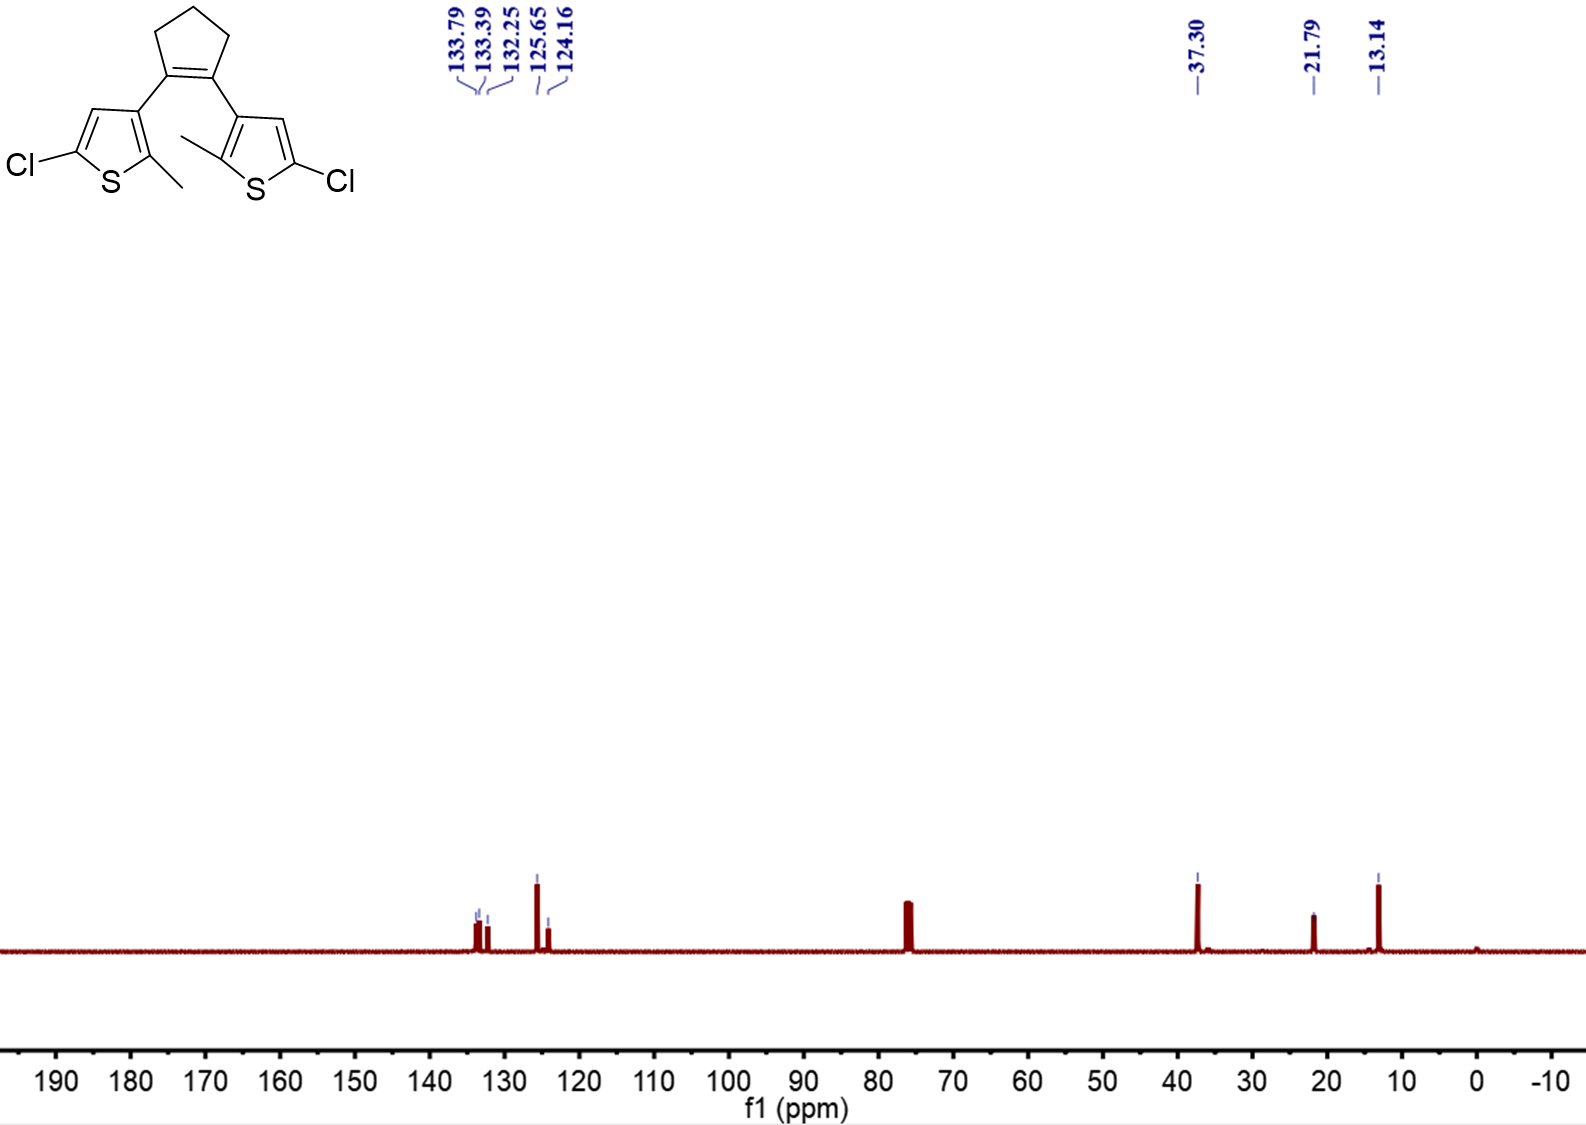


**Supplementary Fig. 5** 13C NMR spectrum of DTE-2Cl in CDCl3.


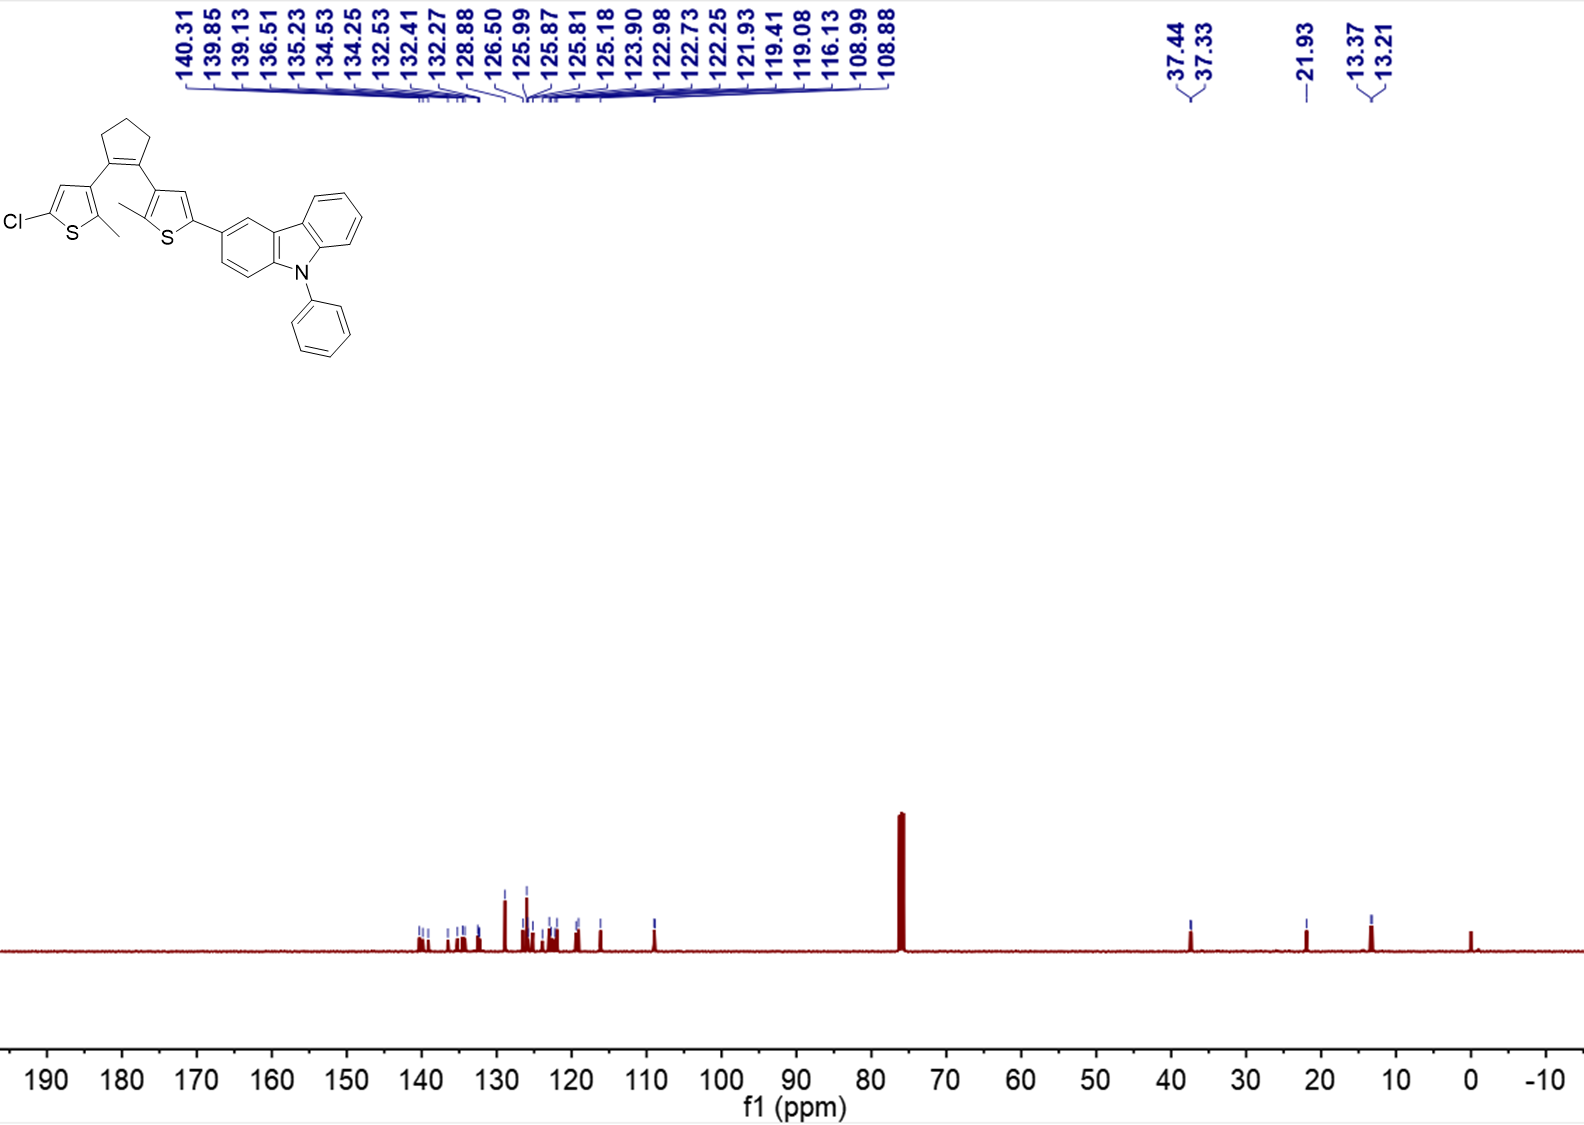


**Supplementary Fig. 6** 13C NMR spectrum of DTE-3PCz in CDCl3.


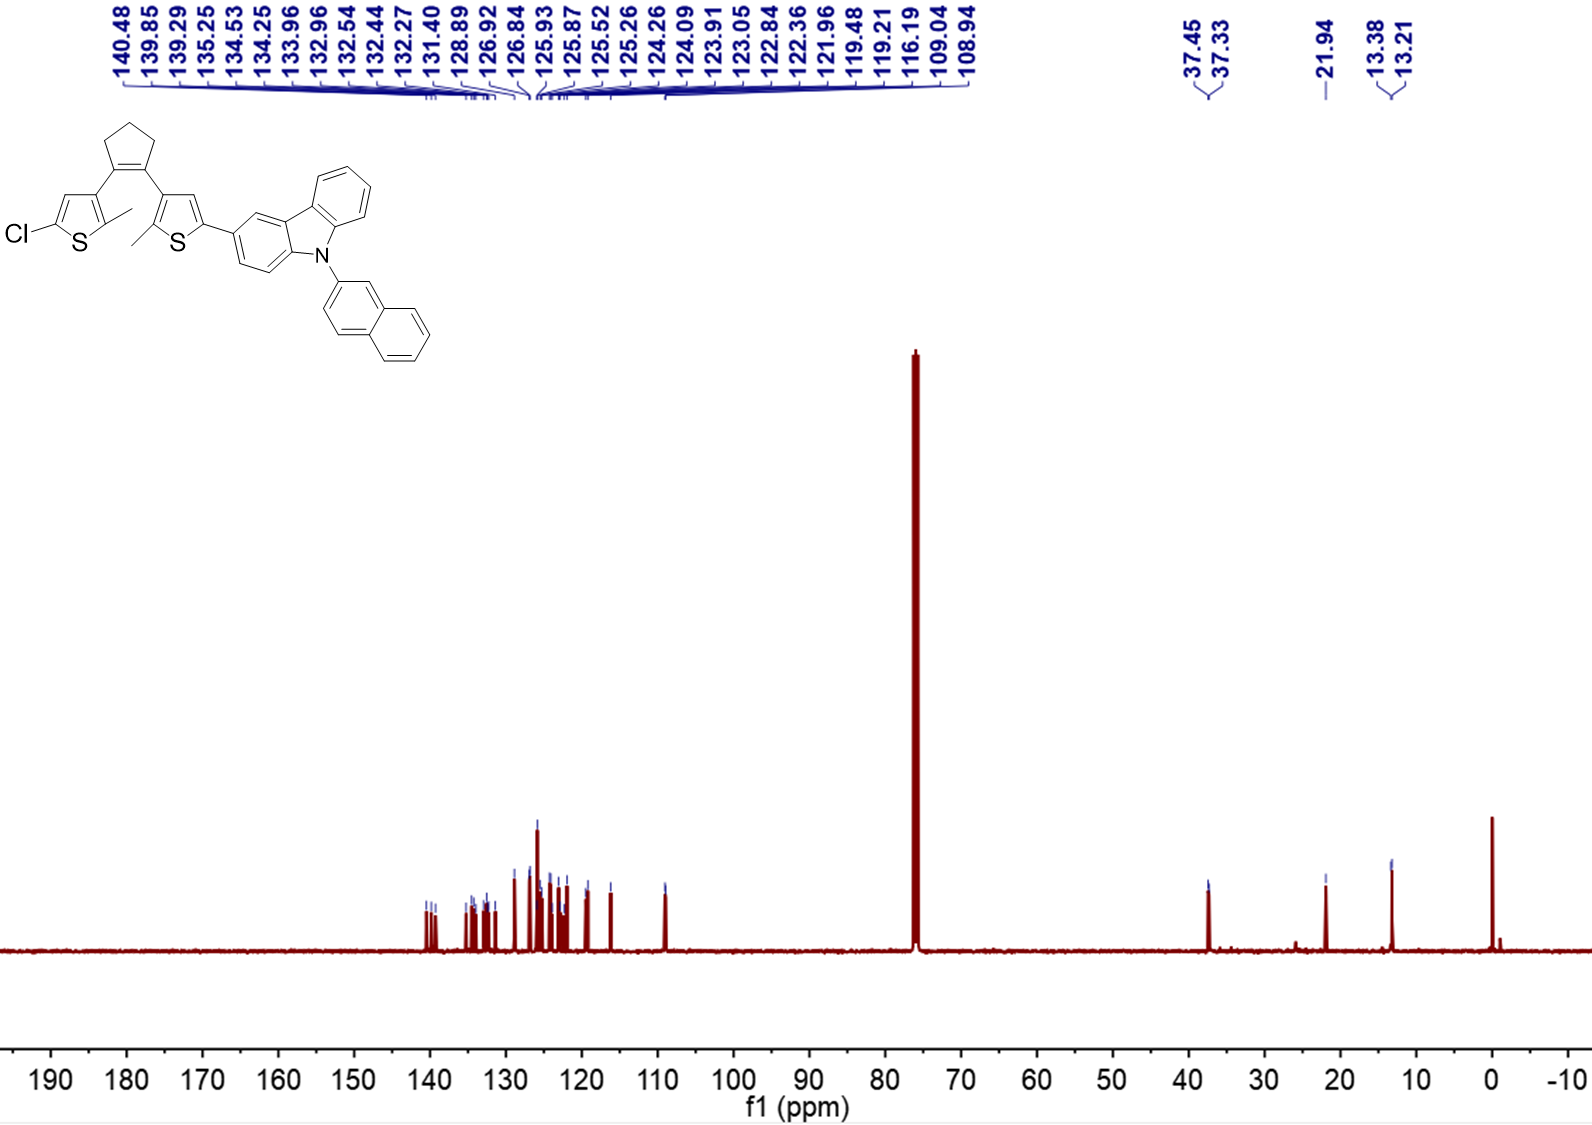


**Supplementary Fig. 7** 13C NMR spectrum of DTE-3NCz in CDCl3.


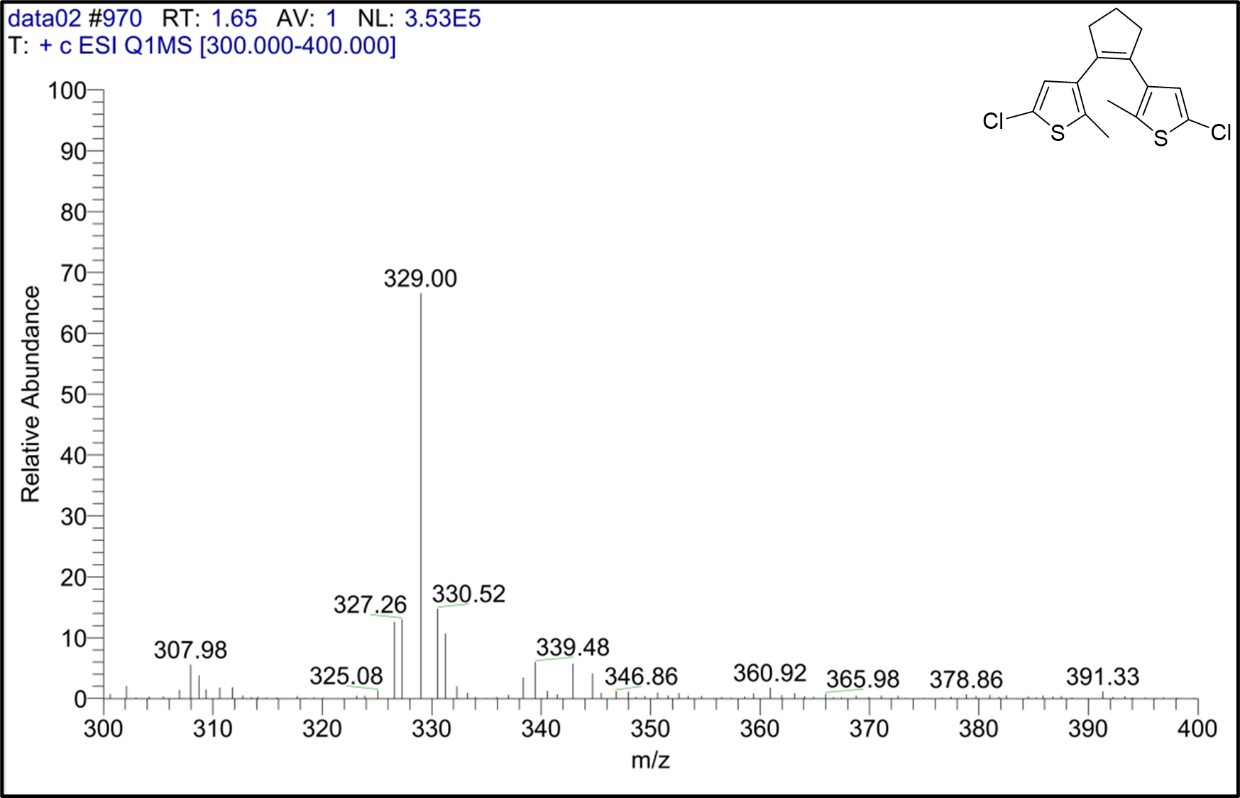


**Supplementary Fig. 8** Liquid chromatography-mass spectrometry of DTE-2Cl.


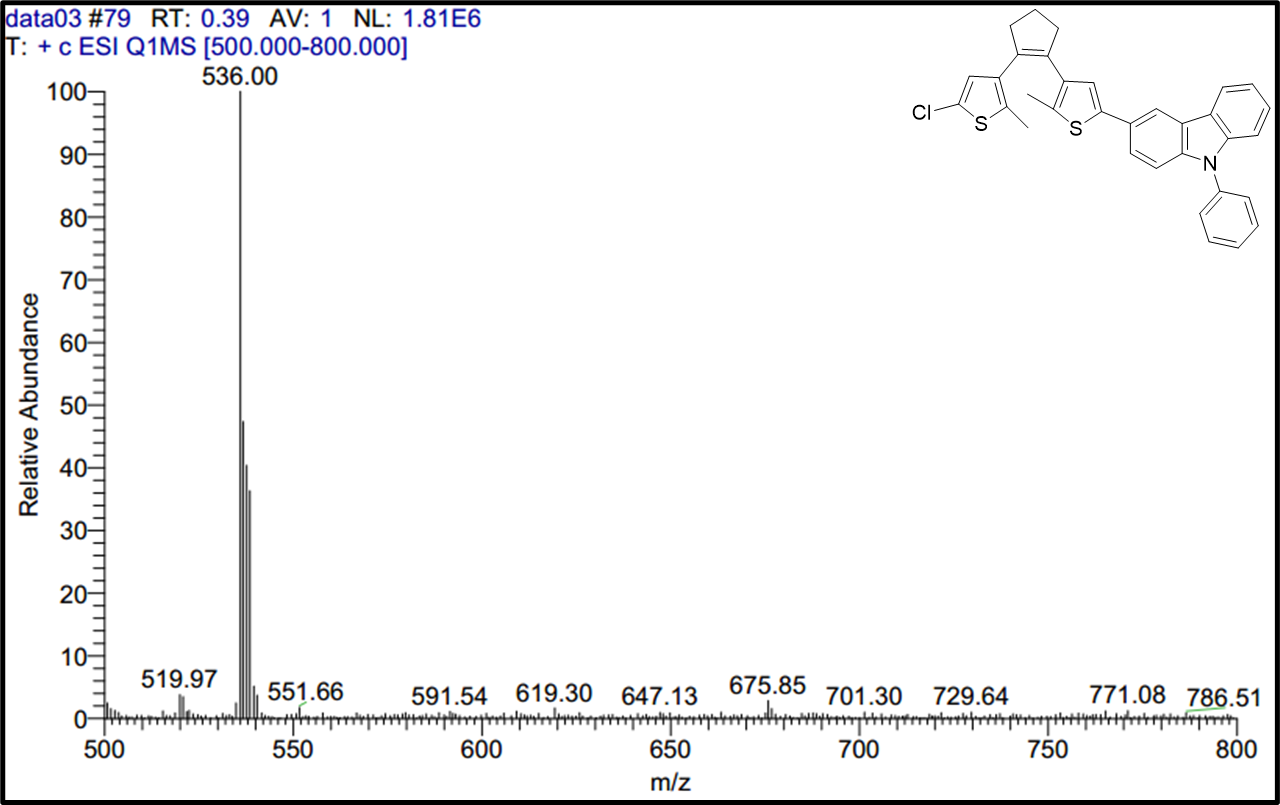


**Supplementary Fig. 9** Liquid chromatography-mass spectrometry of DTE-3PCz.


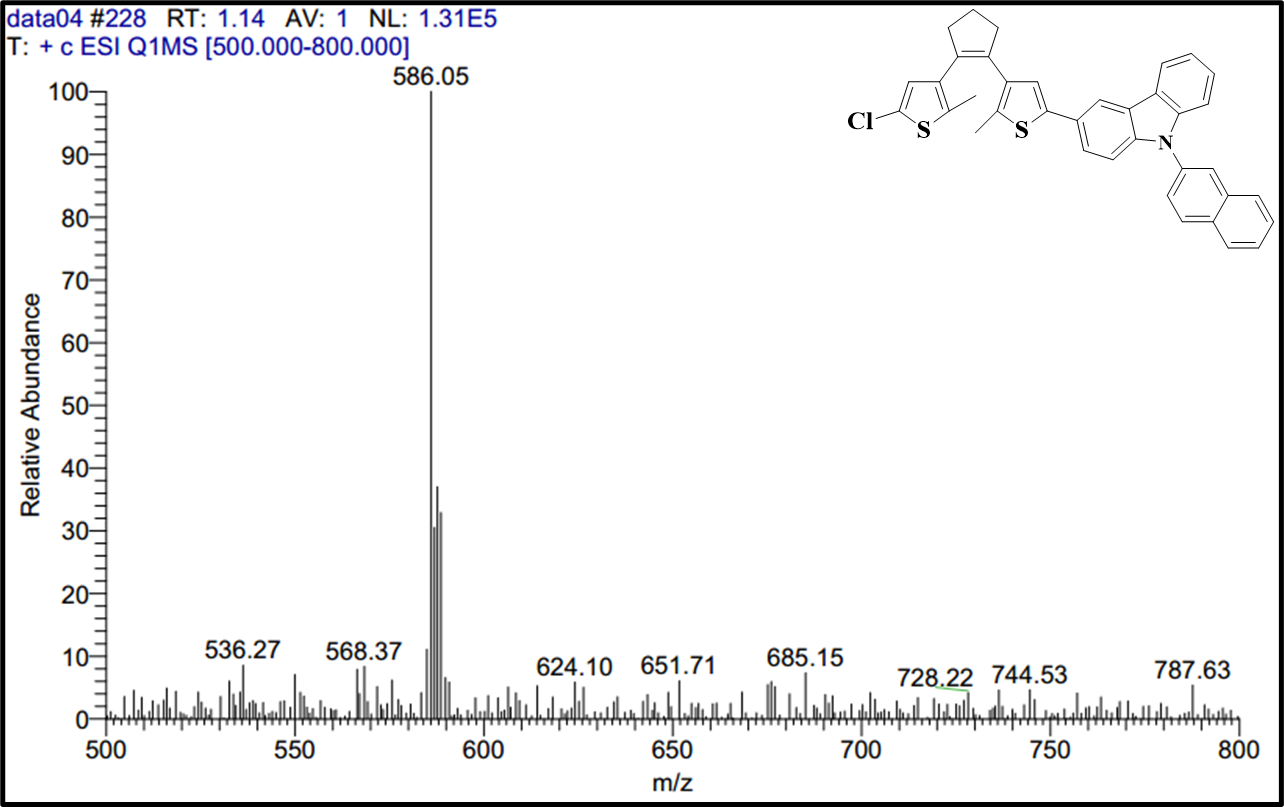


**Supplementary Fig. 10** Liquid chromatography-mass spectrometry of DTE-3NCz.


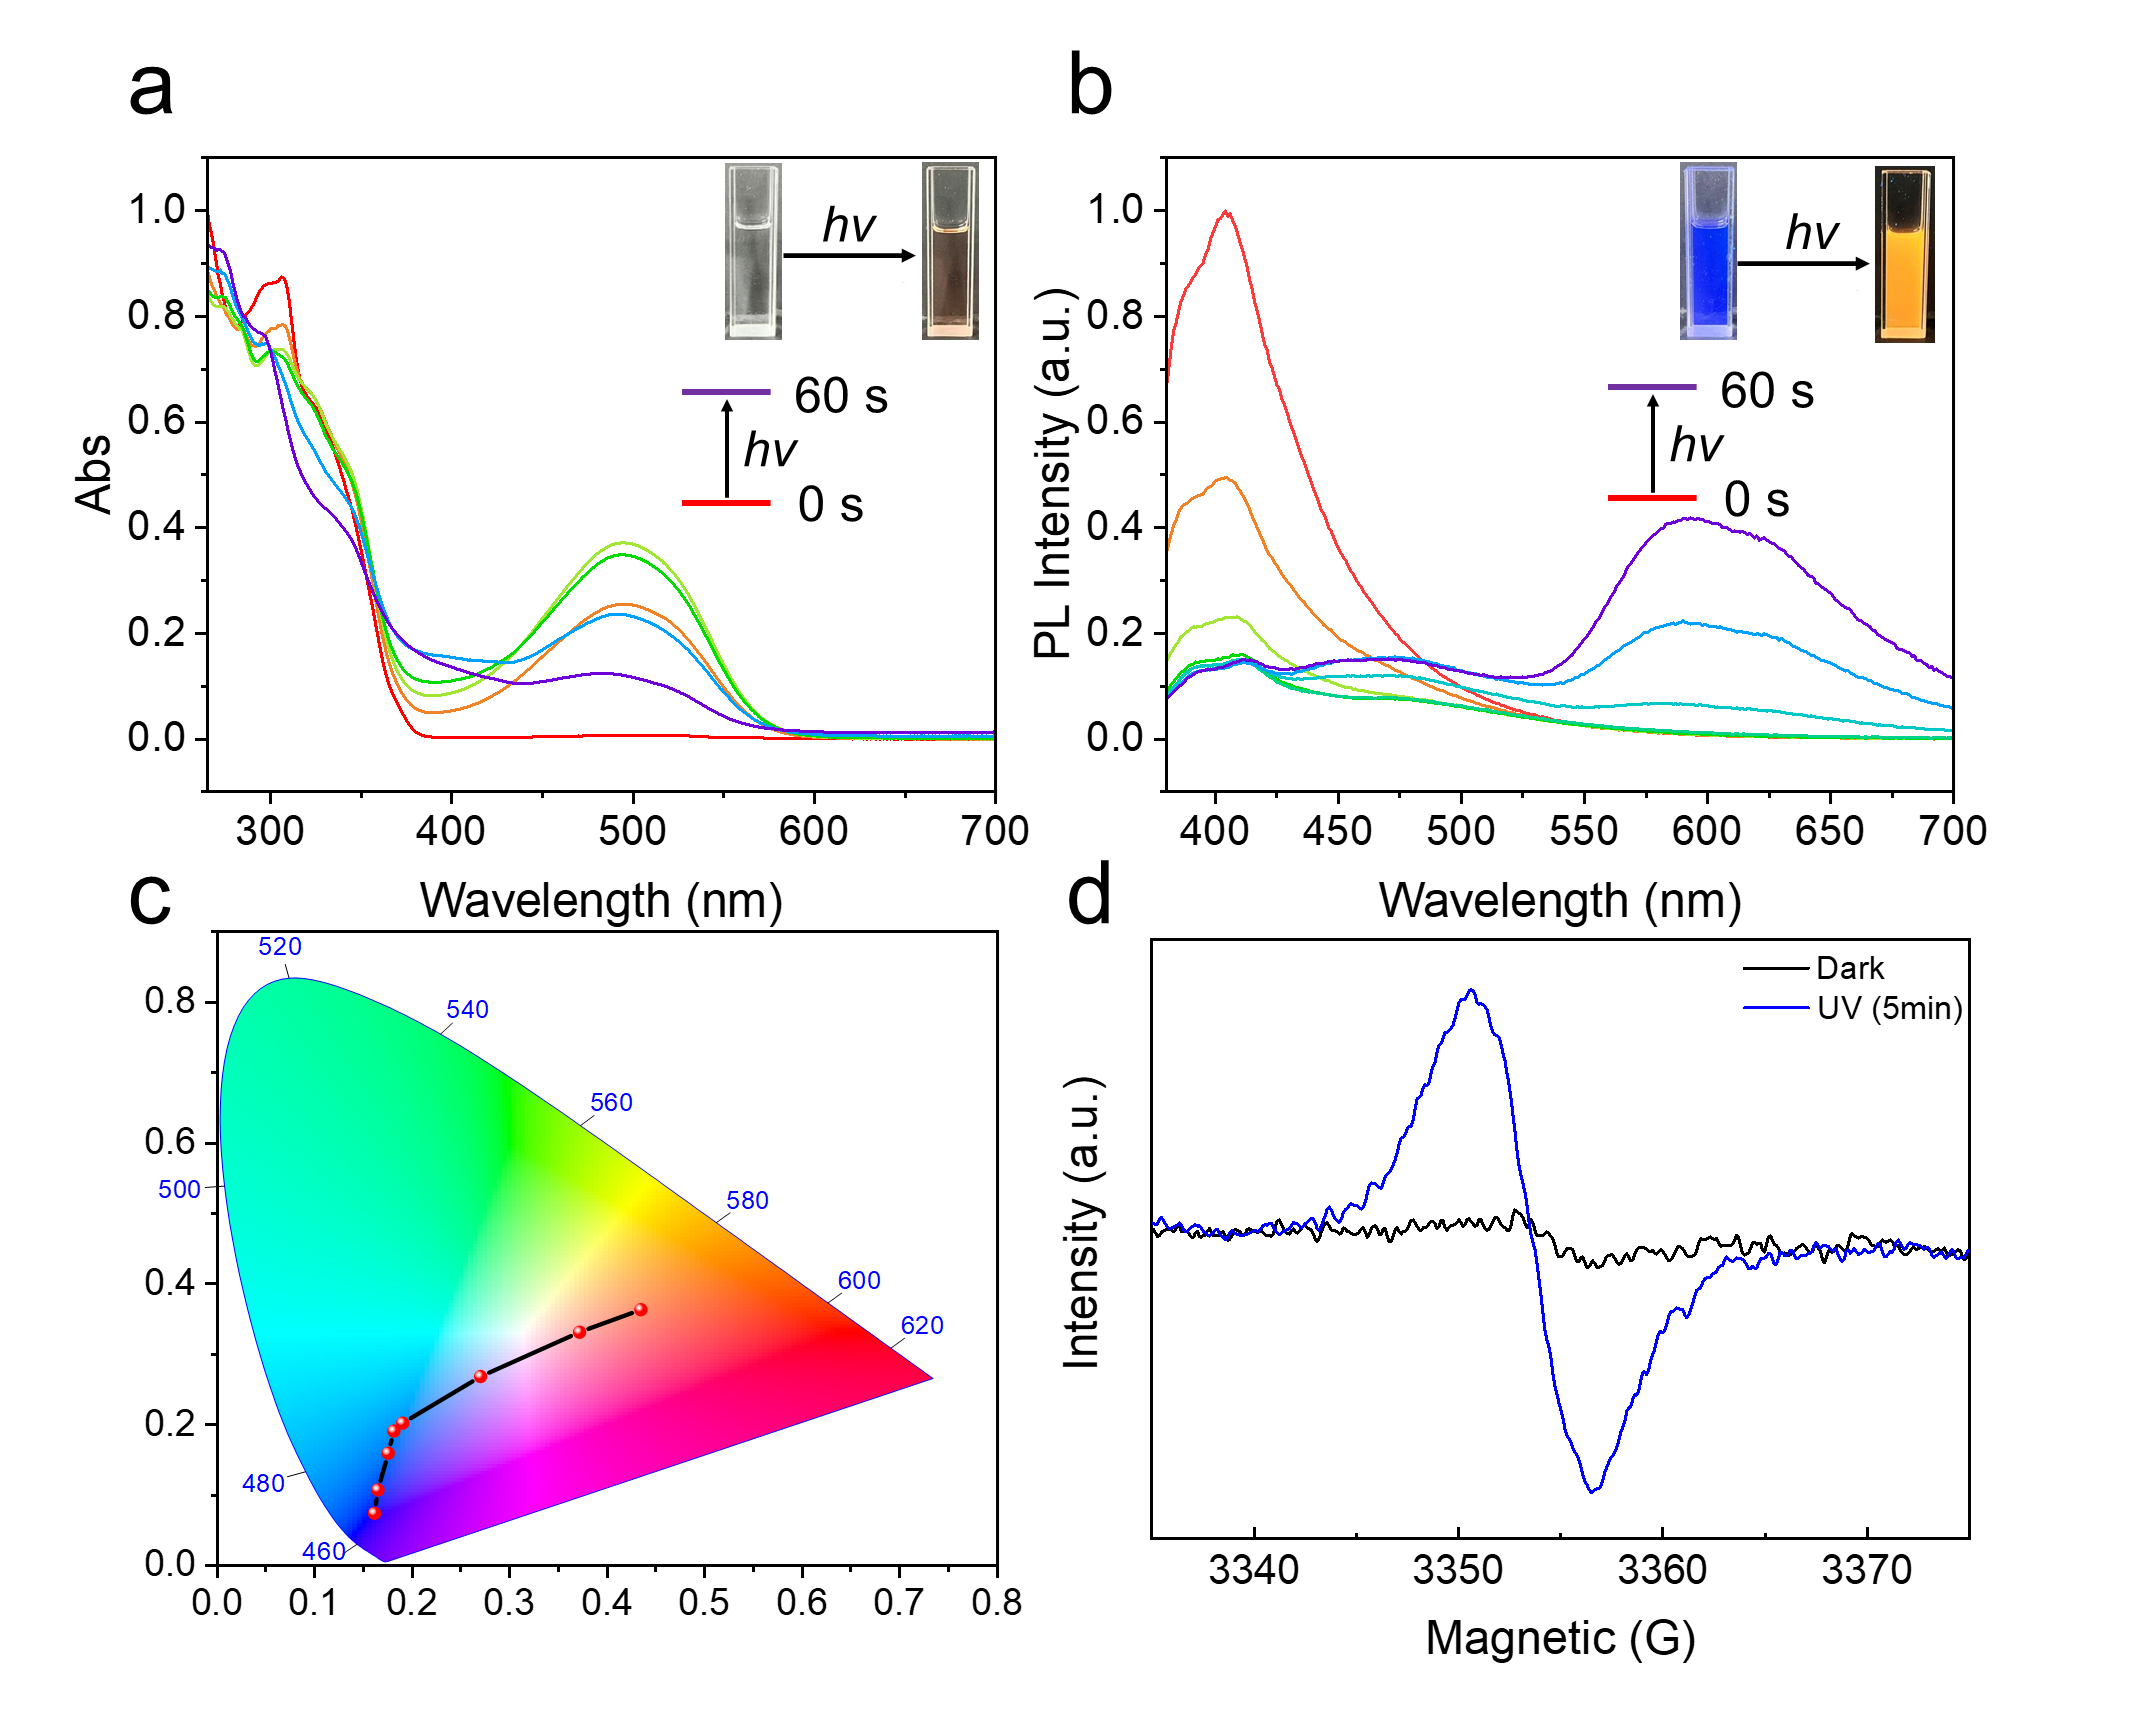


**Supplementary Fig. 11** Photochemical properties. (a) UV-vis absorption spectra and (b) Fluorescence spectra of DTE-3NCz (1.0×10-5 M in dichloromethane (DCM)) upon UV irradiation at room temperature. c Color shifts in the CIE 1931 diagram of a solution of DTE-3NCz (1.0×10-5 M in DCM) under different times of UV irradiation. d EPR spectra before and after UV irradiation (in toluene).


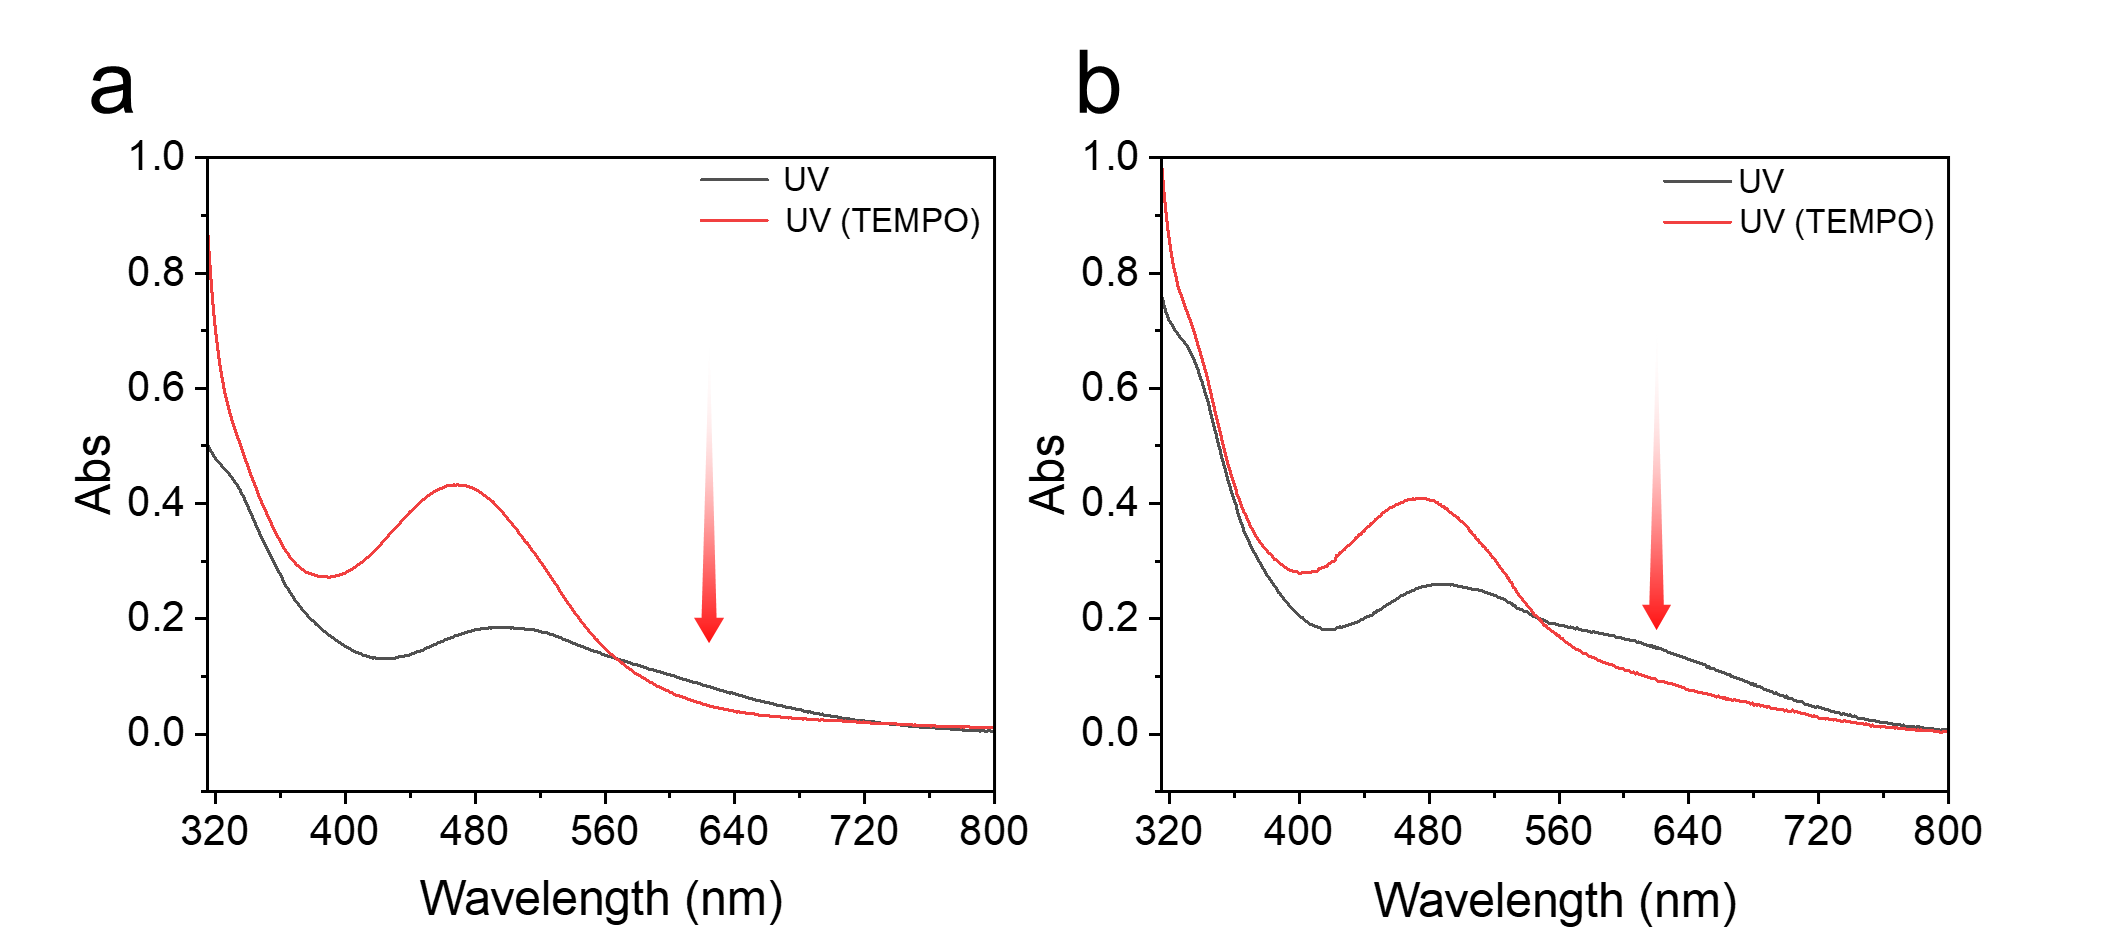


**Supplementary Fig. 12** UV-vis absorption spectra of DTE-3PCz (a) and DTE-3NCz (b) (1.0×10-5 M in DCM) after UV irradiation and subsequent addition of 10 equiv. of TEMPO.


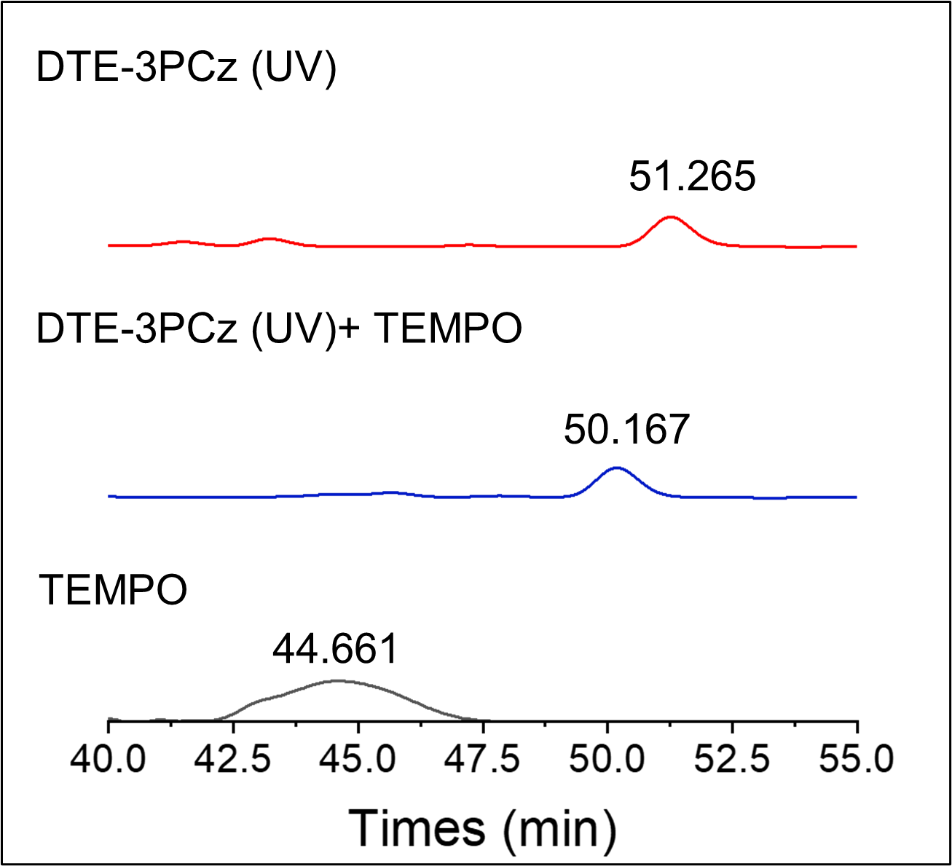


**Supplementary Fig. 13** High-performance liquid chromatography analysis of DTE-3PCz (1.0×10-5 M in acetonitrile) before and after UV irradiation (365 nm). Reaction of DTE-3PCz radical molecules with TEMPO (10 equiv.).


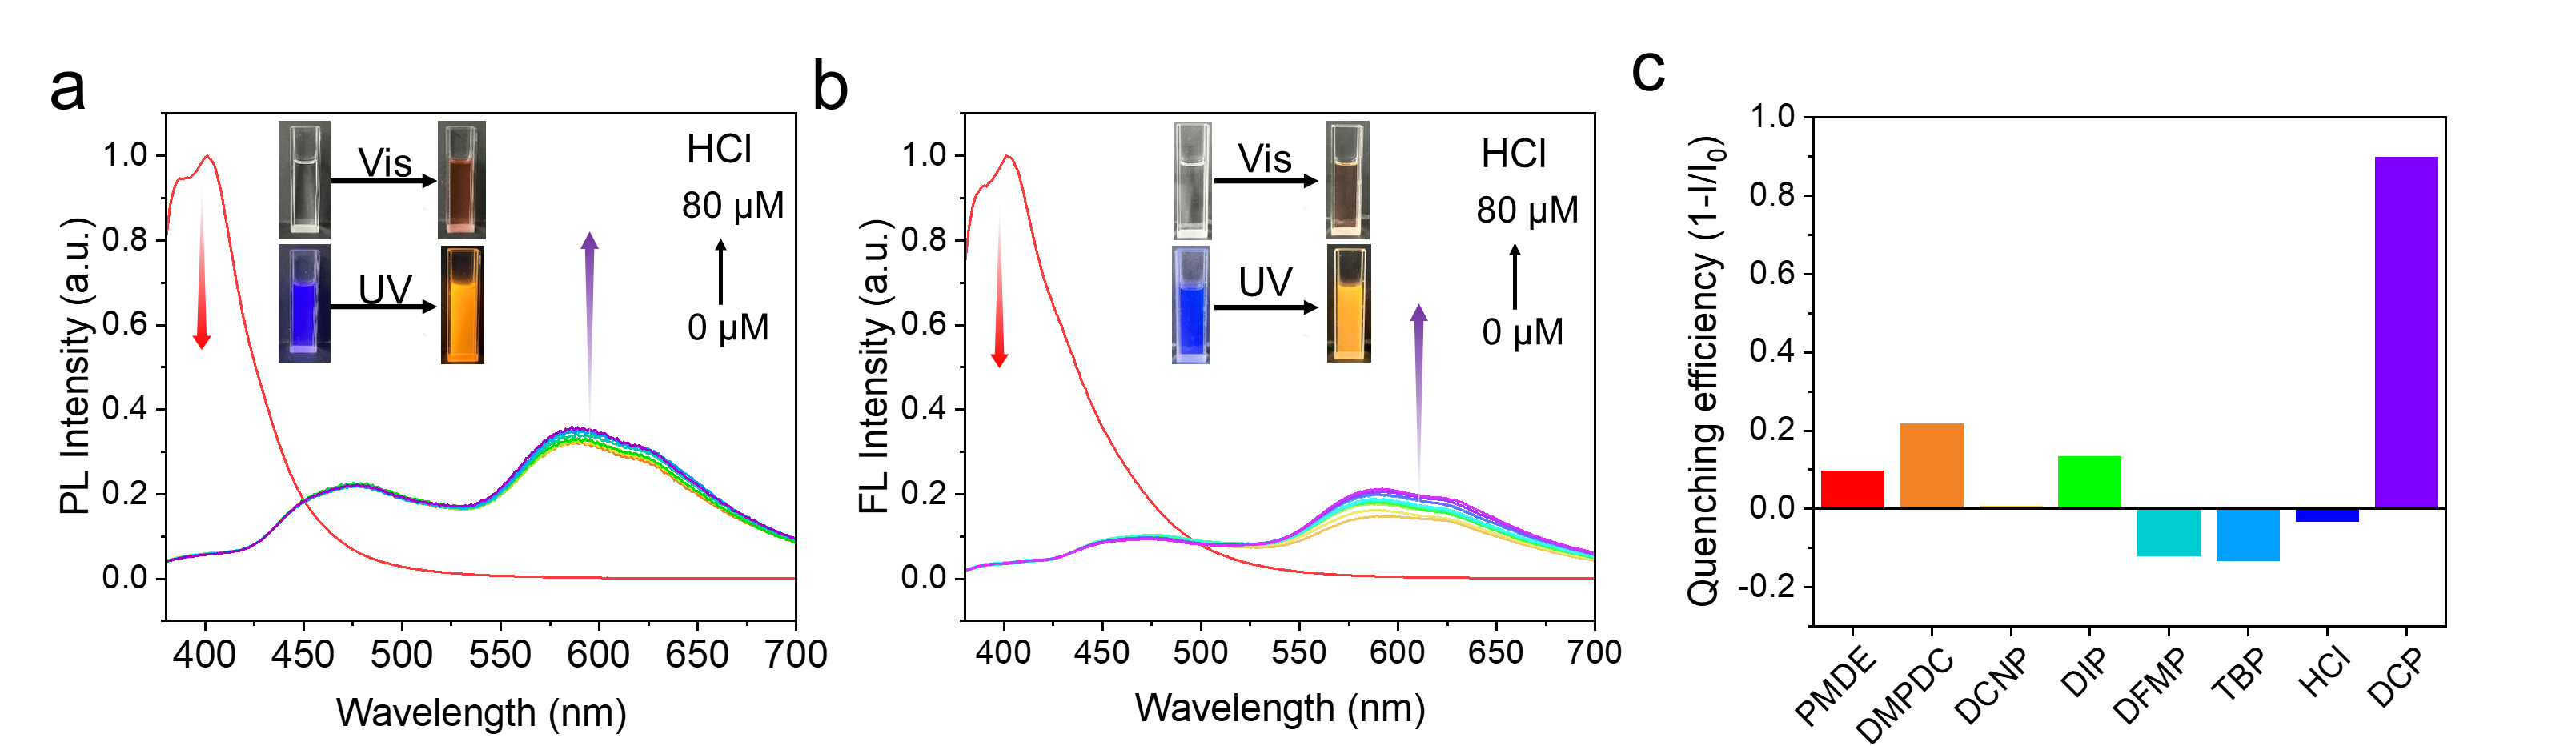


**Supplementary Fig. 14** Fluorescence spectra of DTE-3PCz (a) and DTE-3NCz (b) (1.0×10-5 M in DCM) upon addition of HCl. c The quenching efficiency of DTE-3NCz (1.0×10-5 M in DCM) under UV light irradiation after addition of 10 equiv. of DCP, HCl, and other interfering substances.


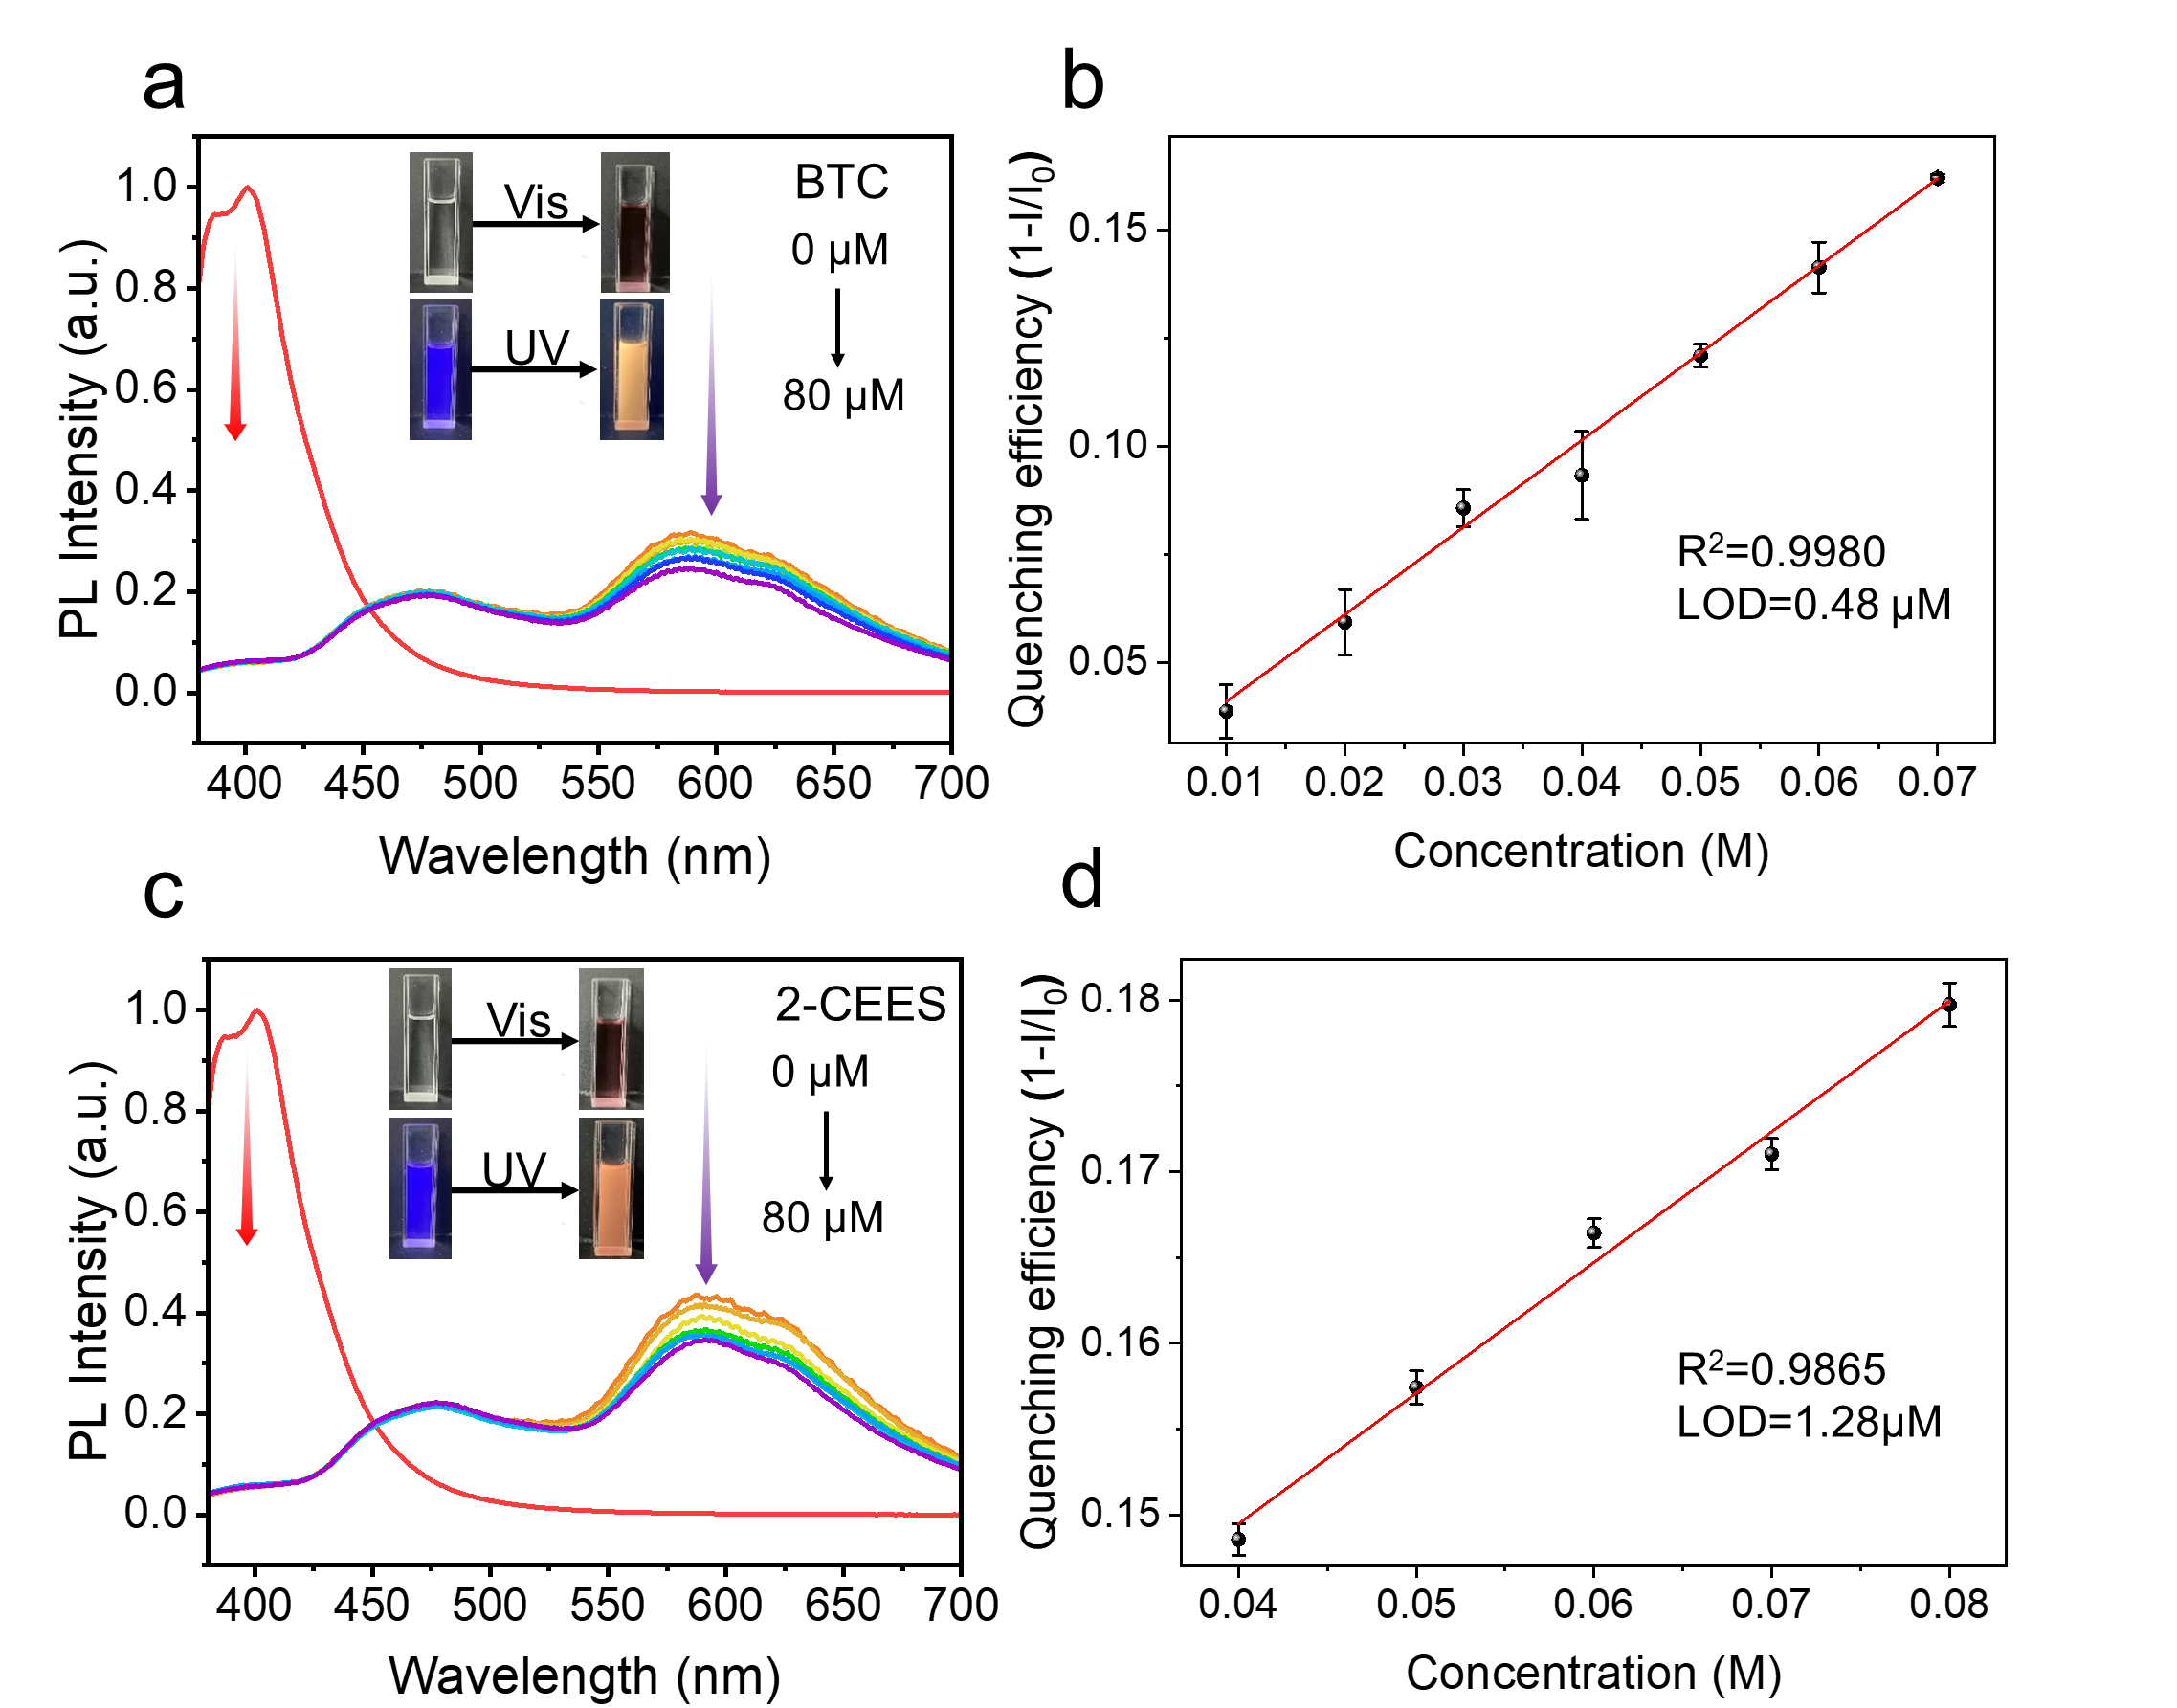


**Supplementary Fig. 15** Fluorescence spectra of DTE-3PCz (1.0×10-5 M in DCM) upon addition of(a) BTC, (c) 2-CEES. Linear relationship between quenching efficiency of DTE-3PCz solution upon addition of (b) BTC, (d) 2-CEES. Error bars stand for standard deviation.


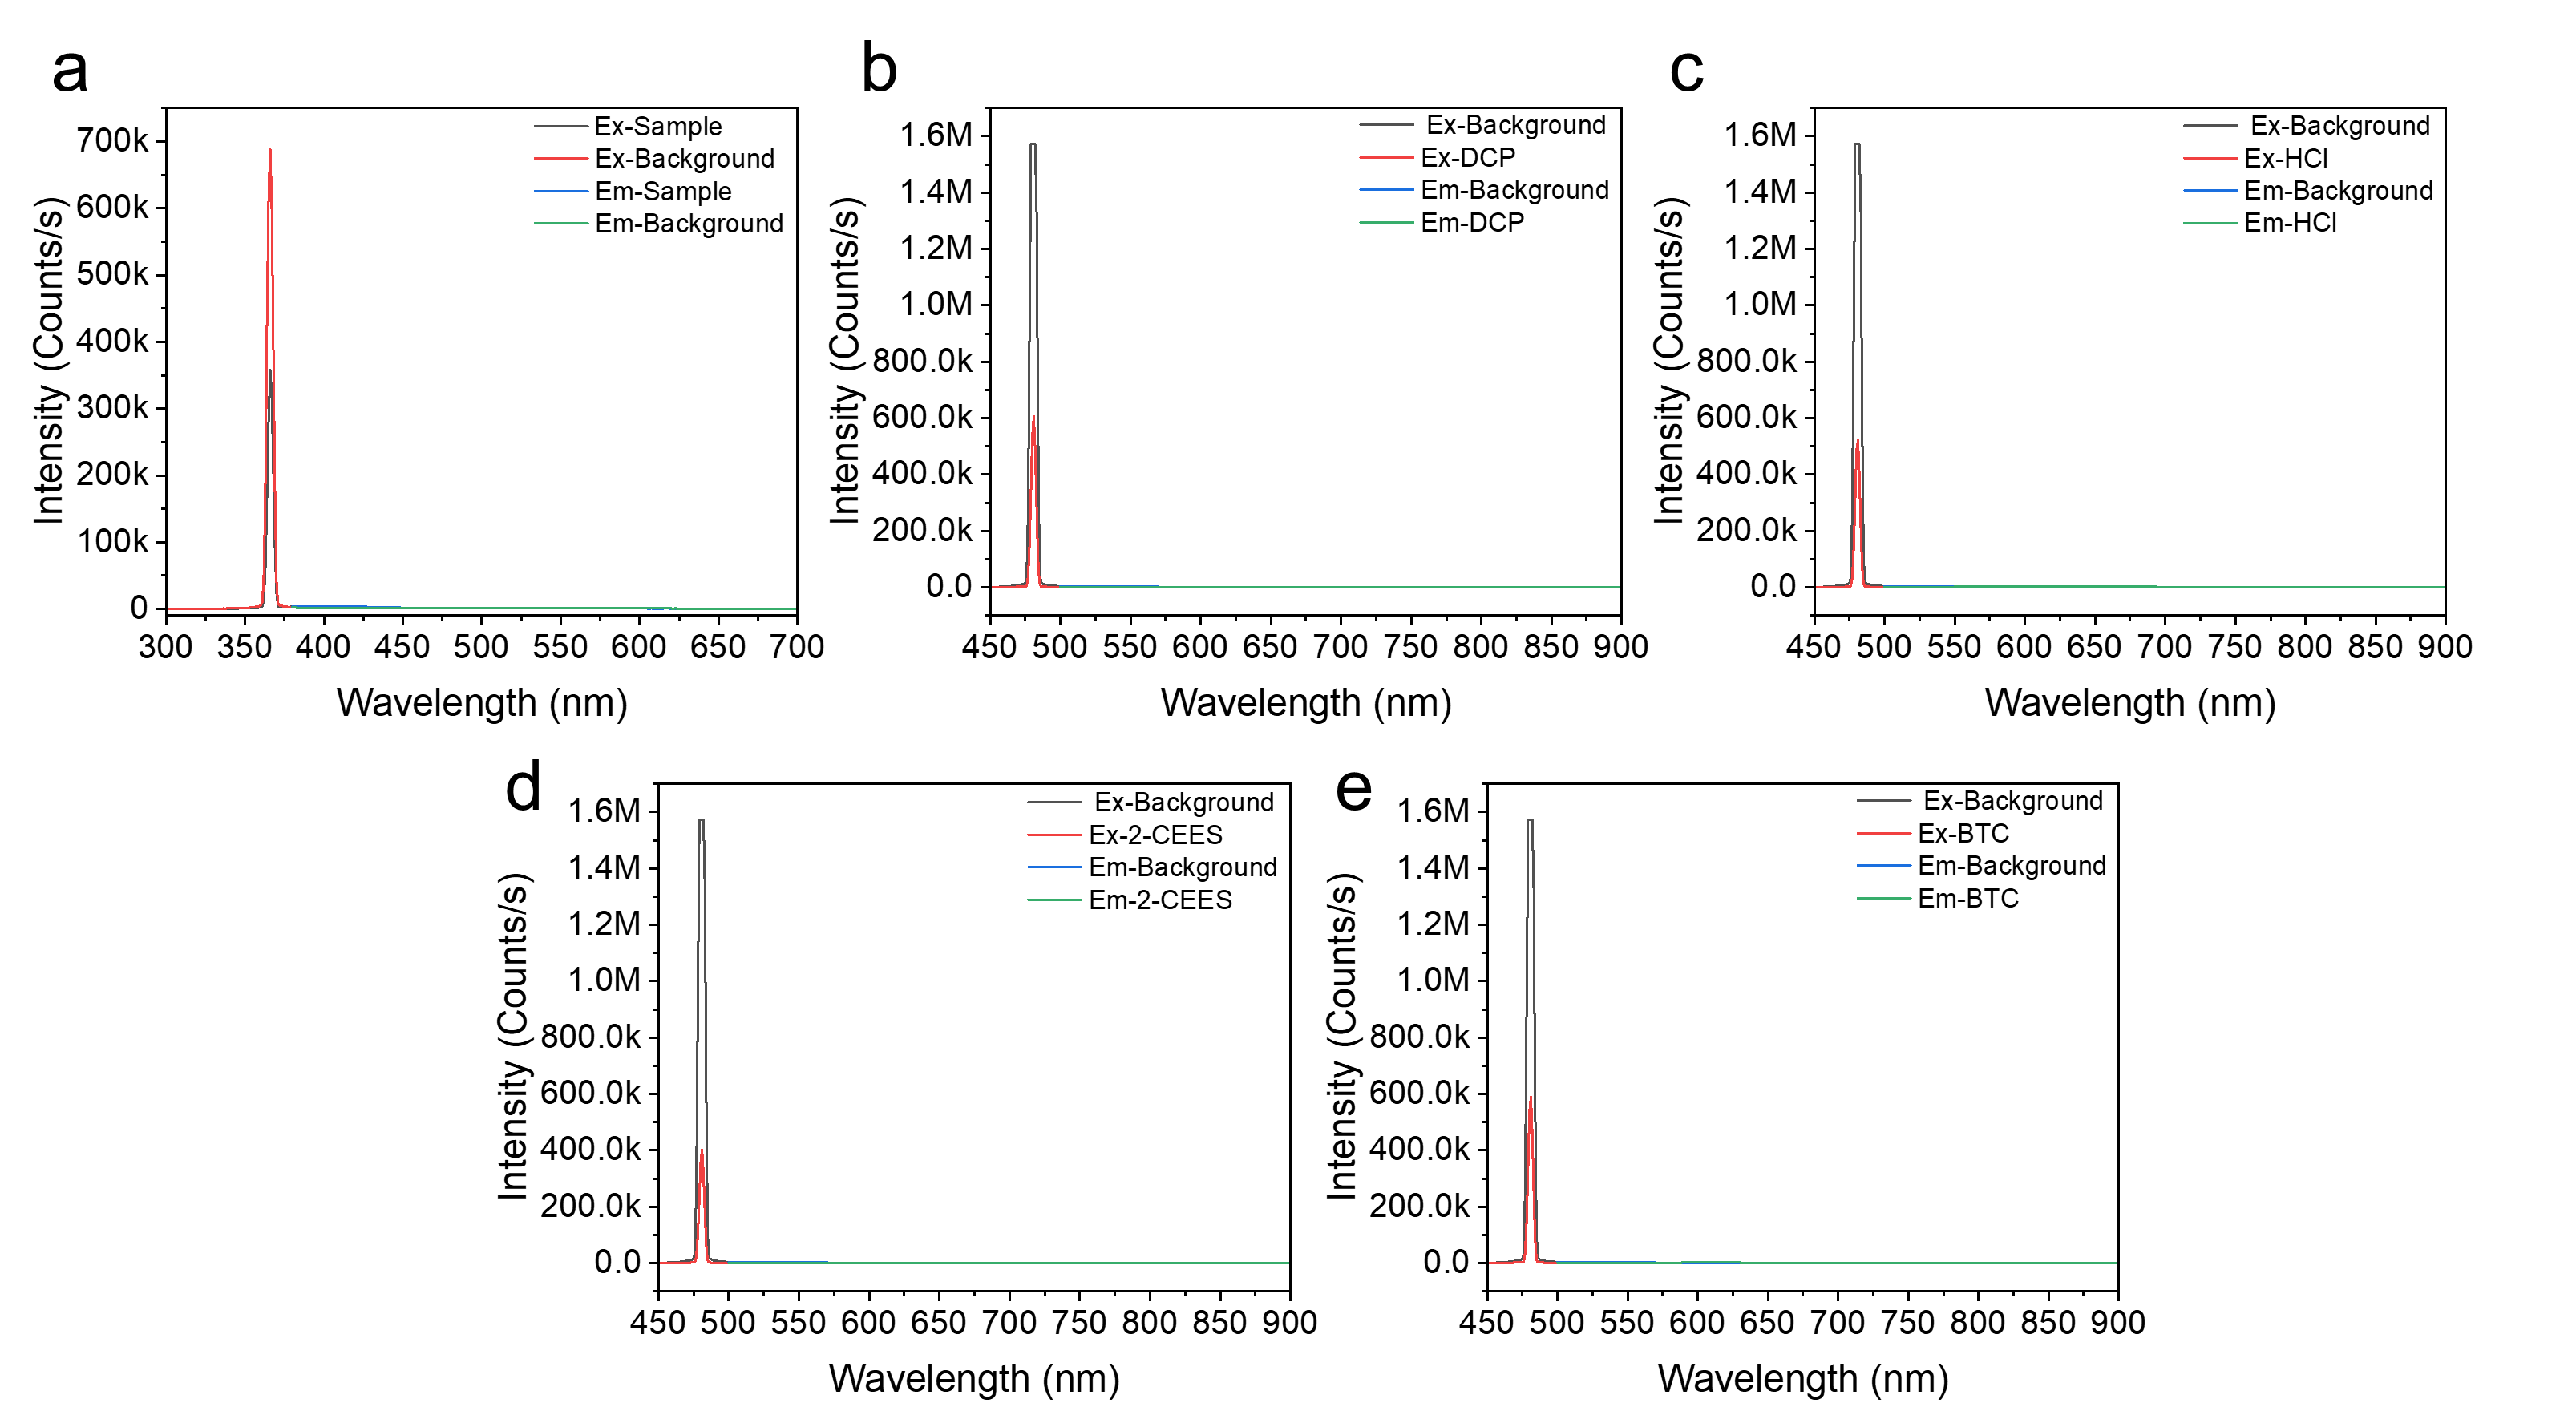


**Supplementary Fig. 16** The photoluminescence quantum yield (PLQY) of DTE-3PCz (1.0×10-5 M)in (a) original, (b) DCP, (c) HCl, (d) 2-CEES and (e) BTC DCM solution.


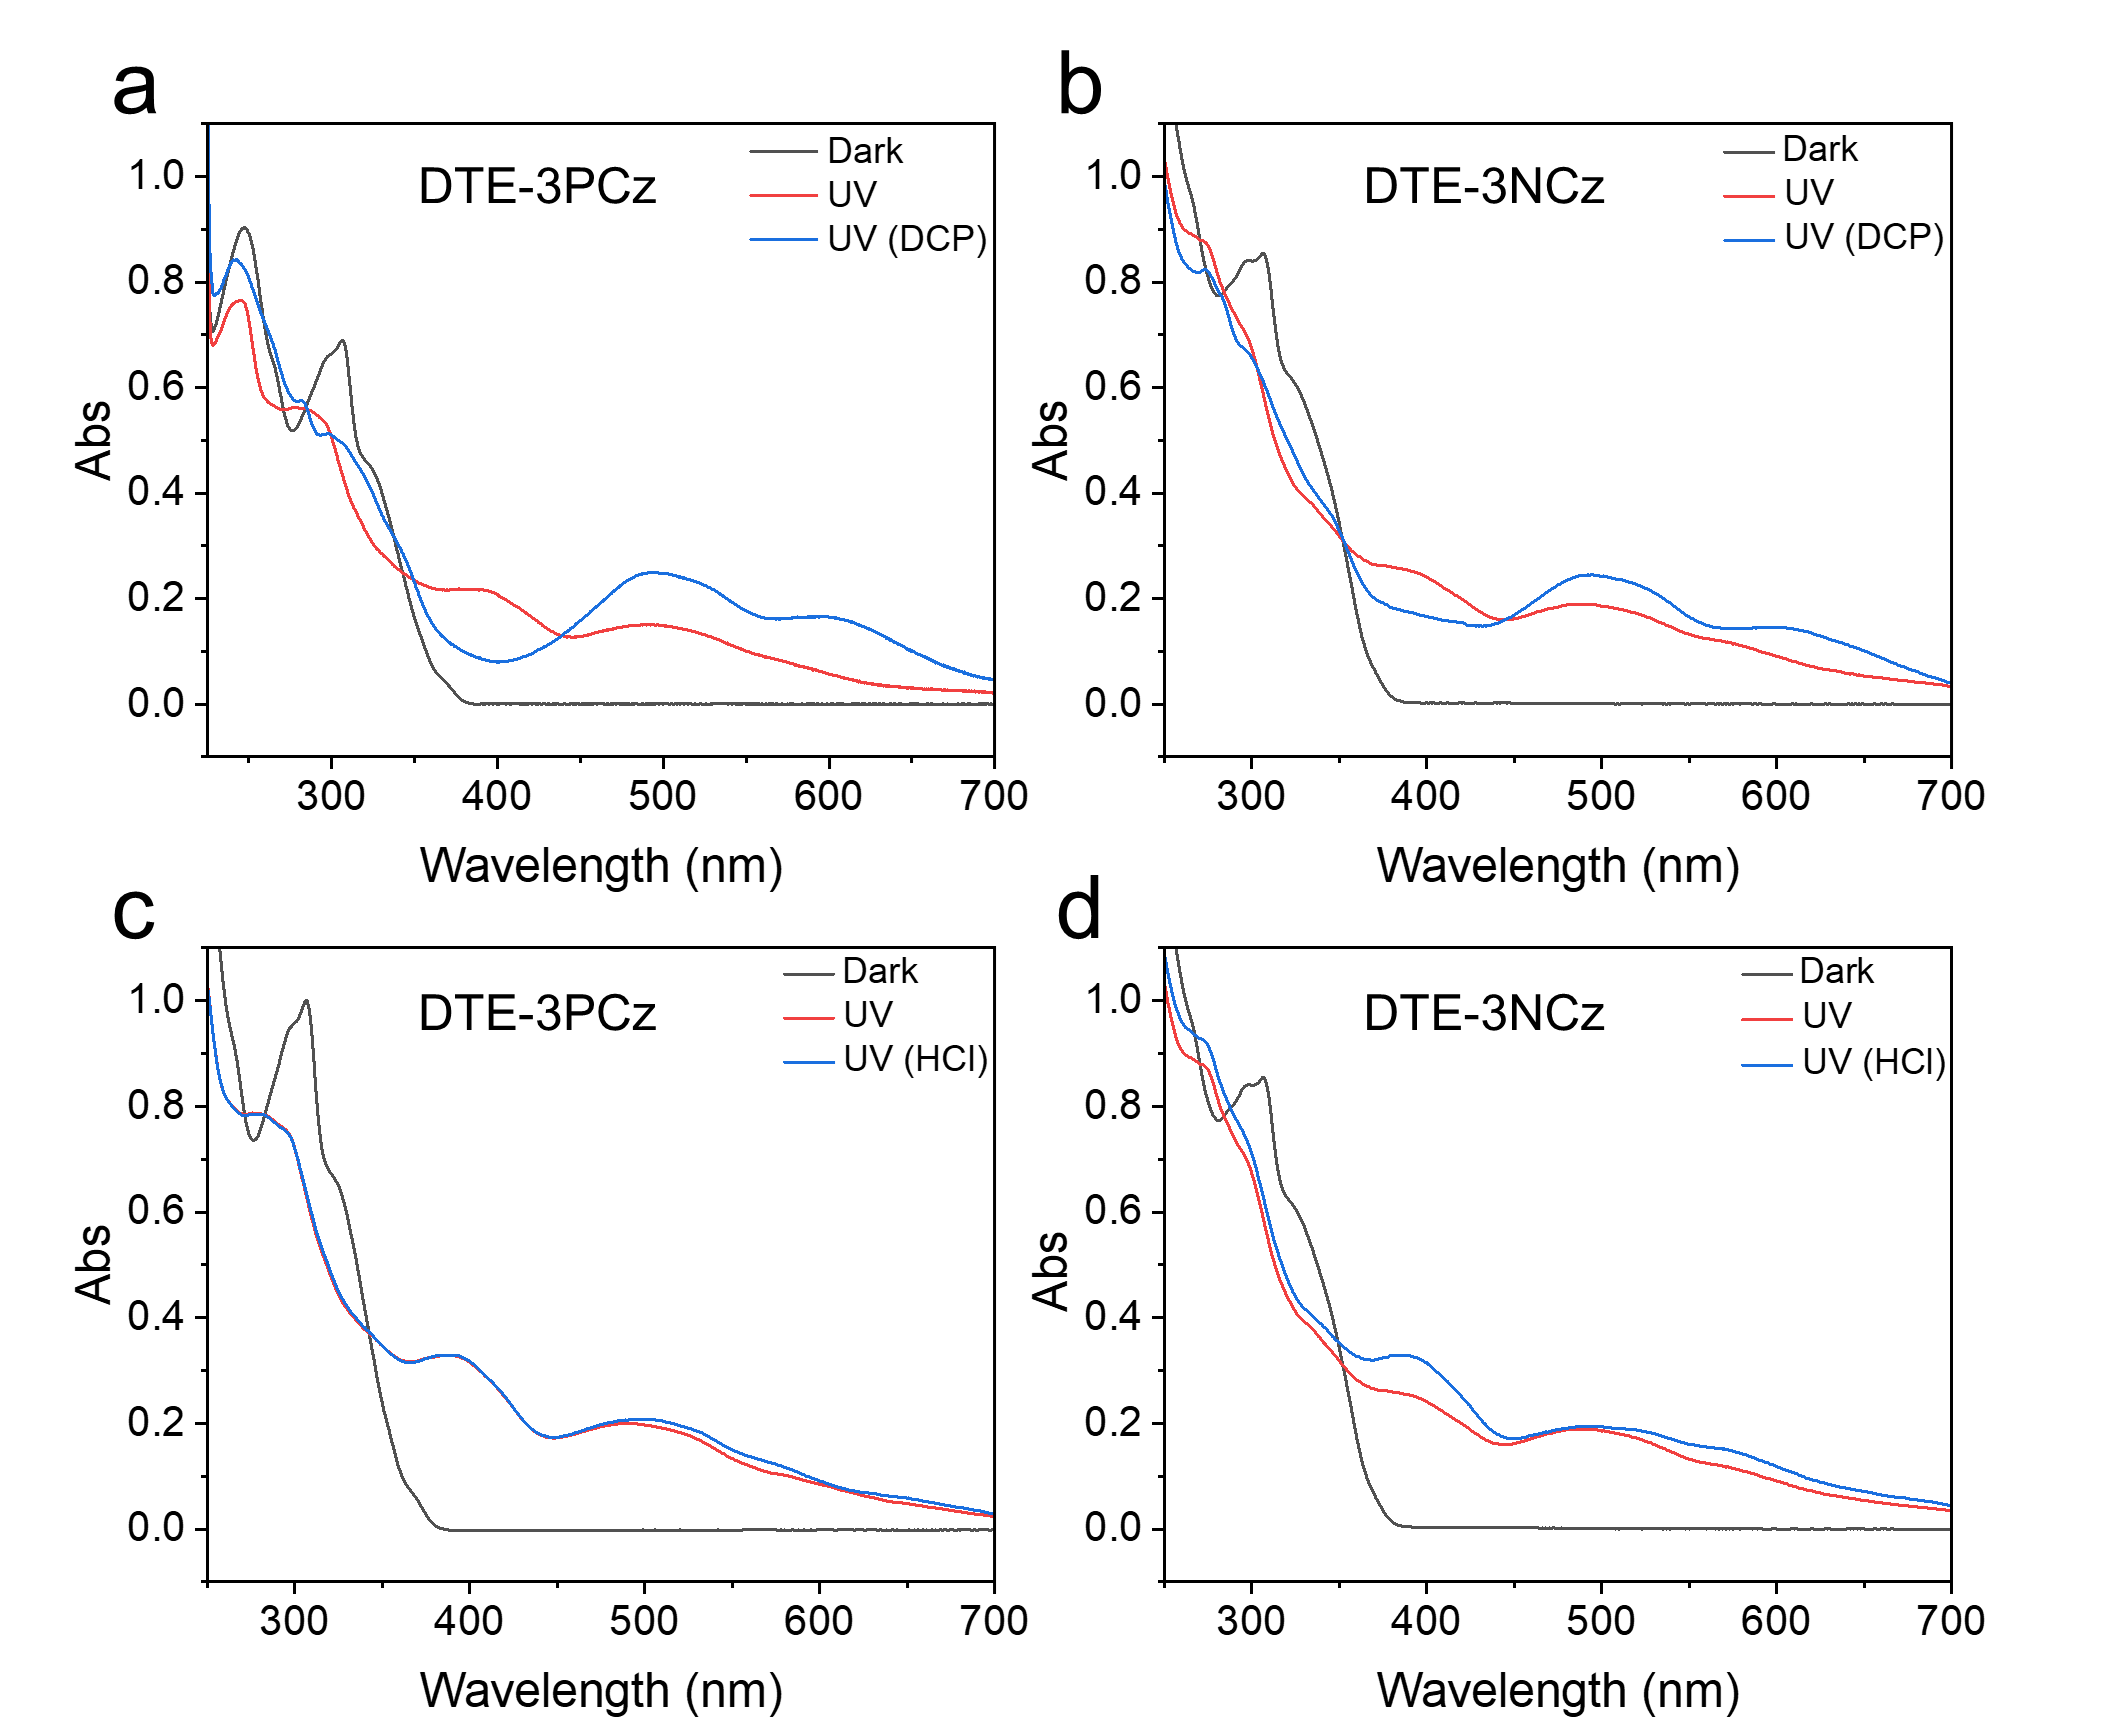


**Supplementary Fig. 17** UV-vis spectra of DTE-3PCz and DTE-3NCz (1.0×10-5 M in DCM) upon addition of DCP (a, b), HCl (c, d).

**
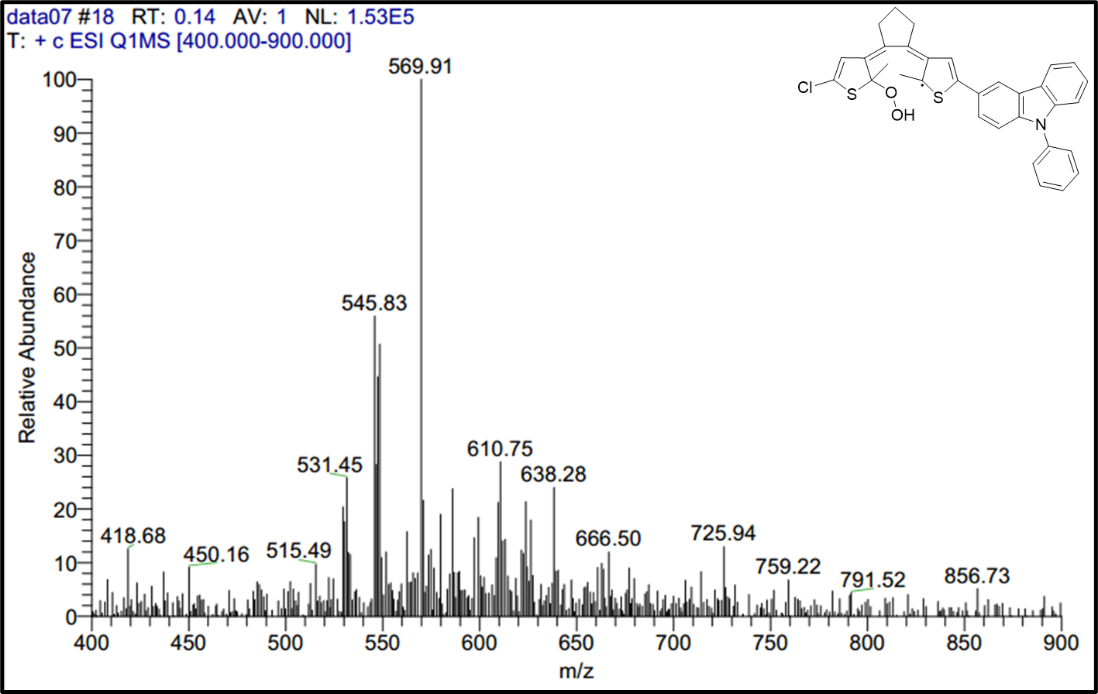
**

**Supplementary Fig. 18** Liquid chromatography-mass spectrometry of DTE-3PCz (HCl) radical.

**
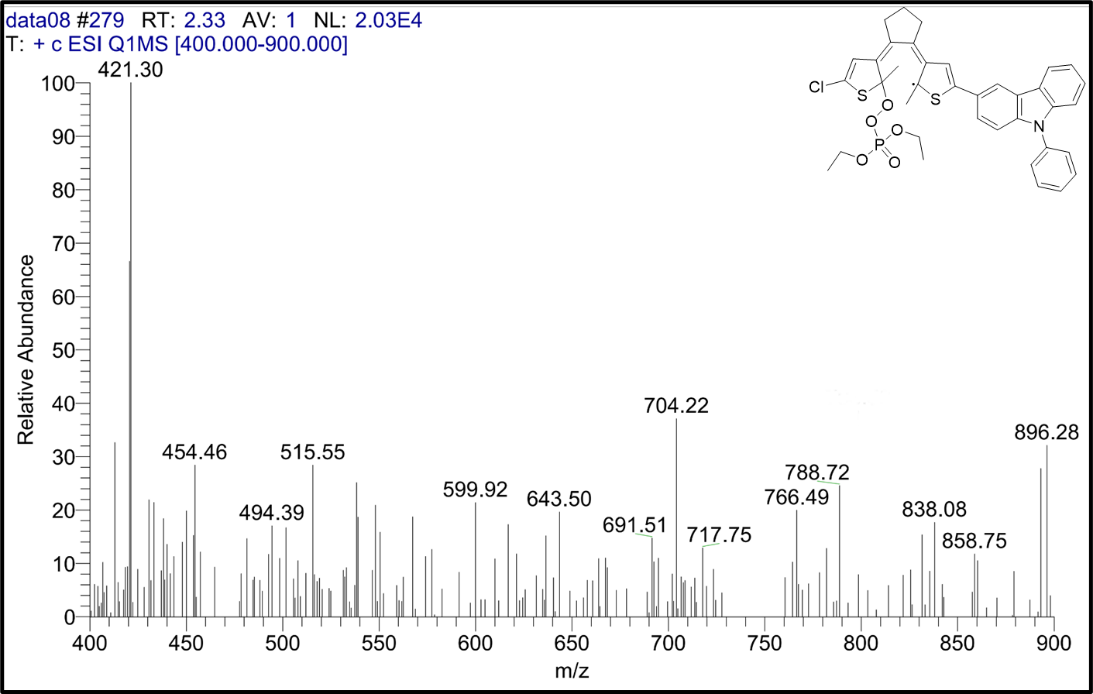
**

**Supplementary Fig. 19** Liquid chromatography-mass spectrometry of DTE-3PCz (DCP) radical.


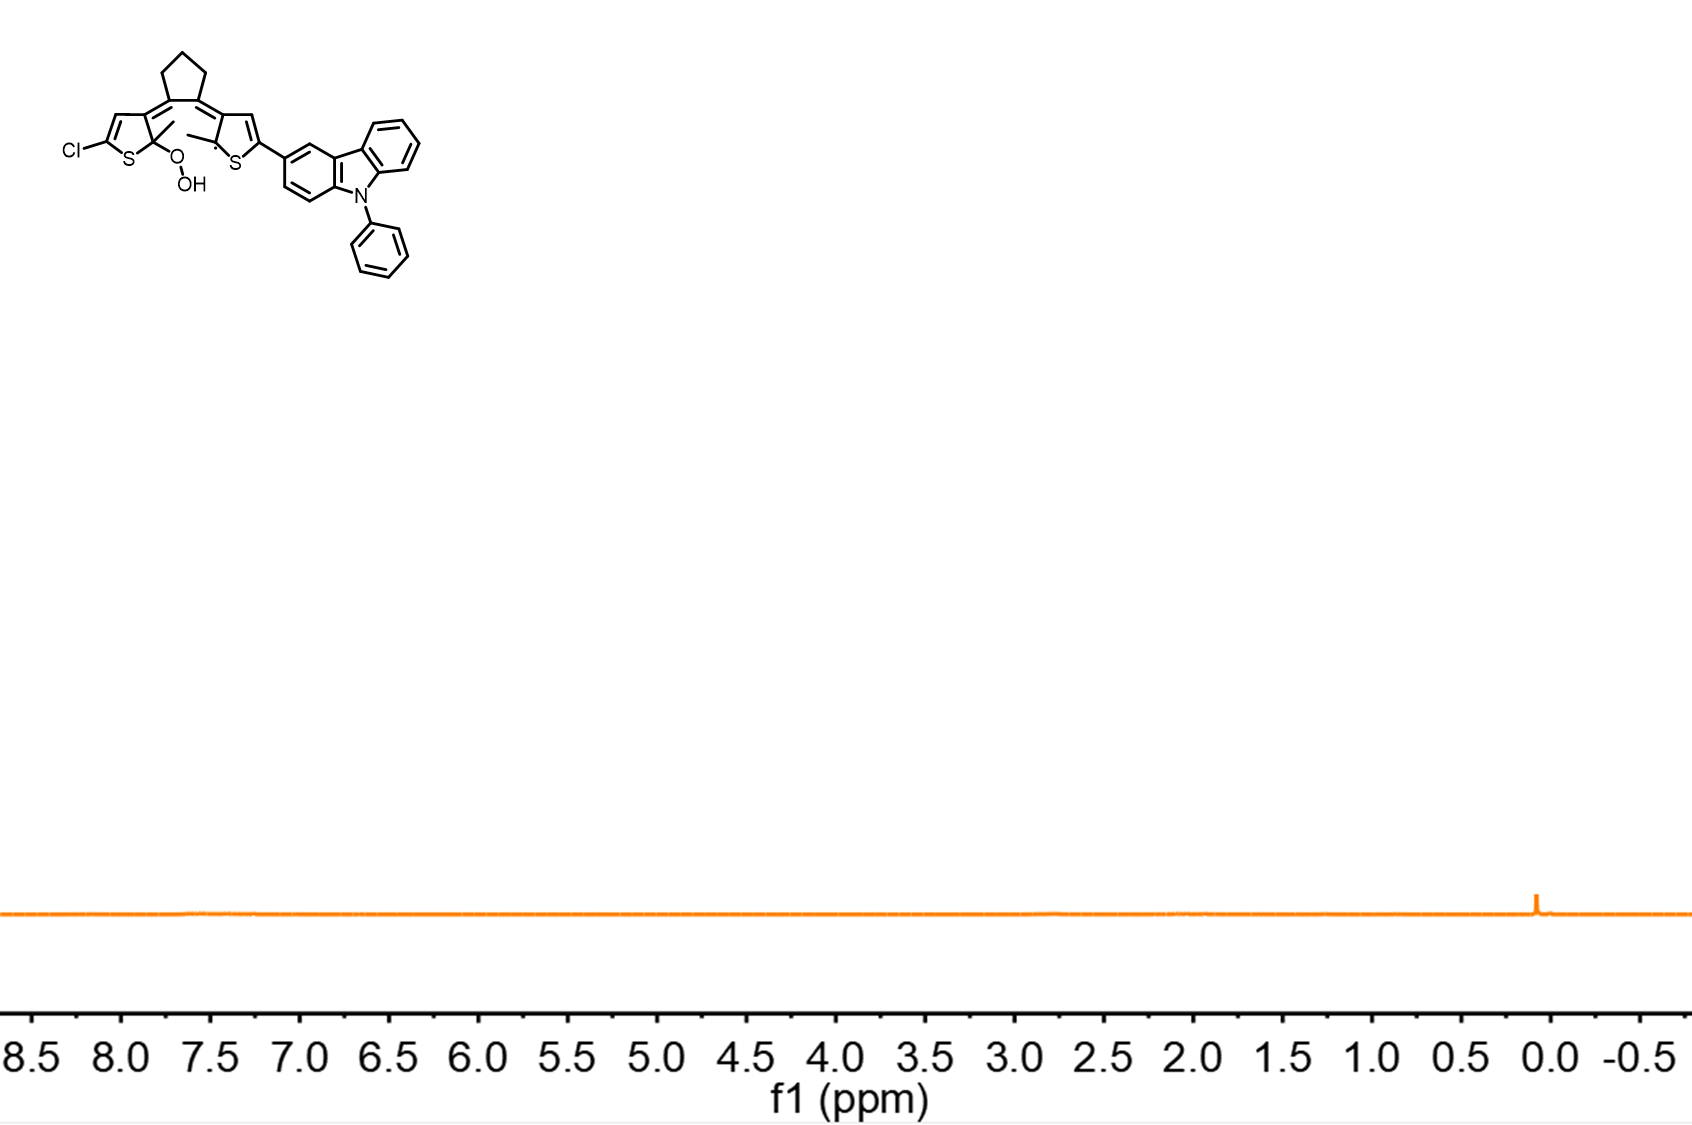


**Supplementary Fig. 20** 1H NMR of DTE-3PCz in CDCl3 solution under UV irradiation after addition of 10 equiv. of HCl.


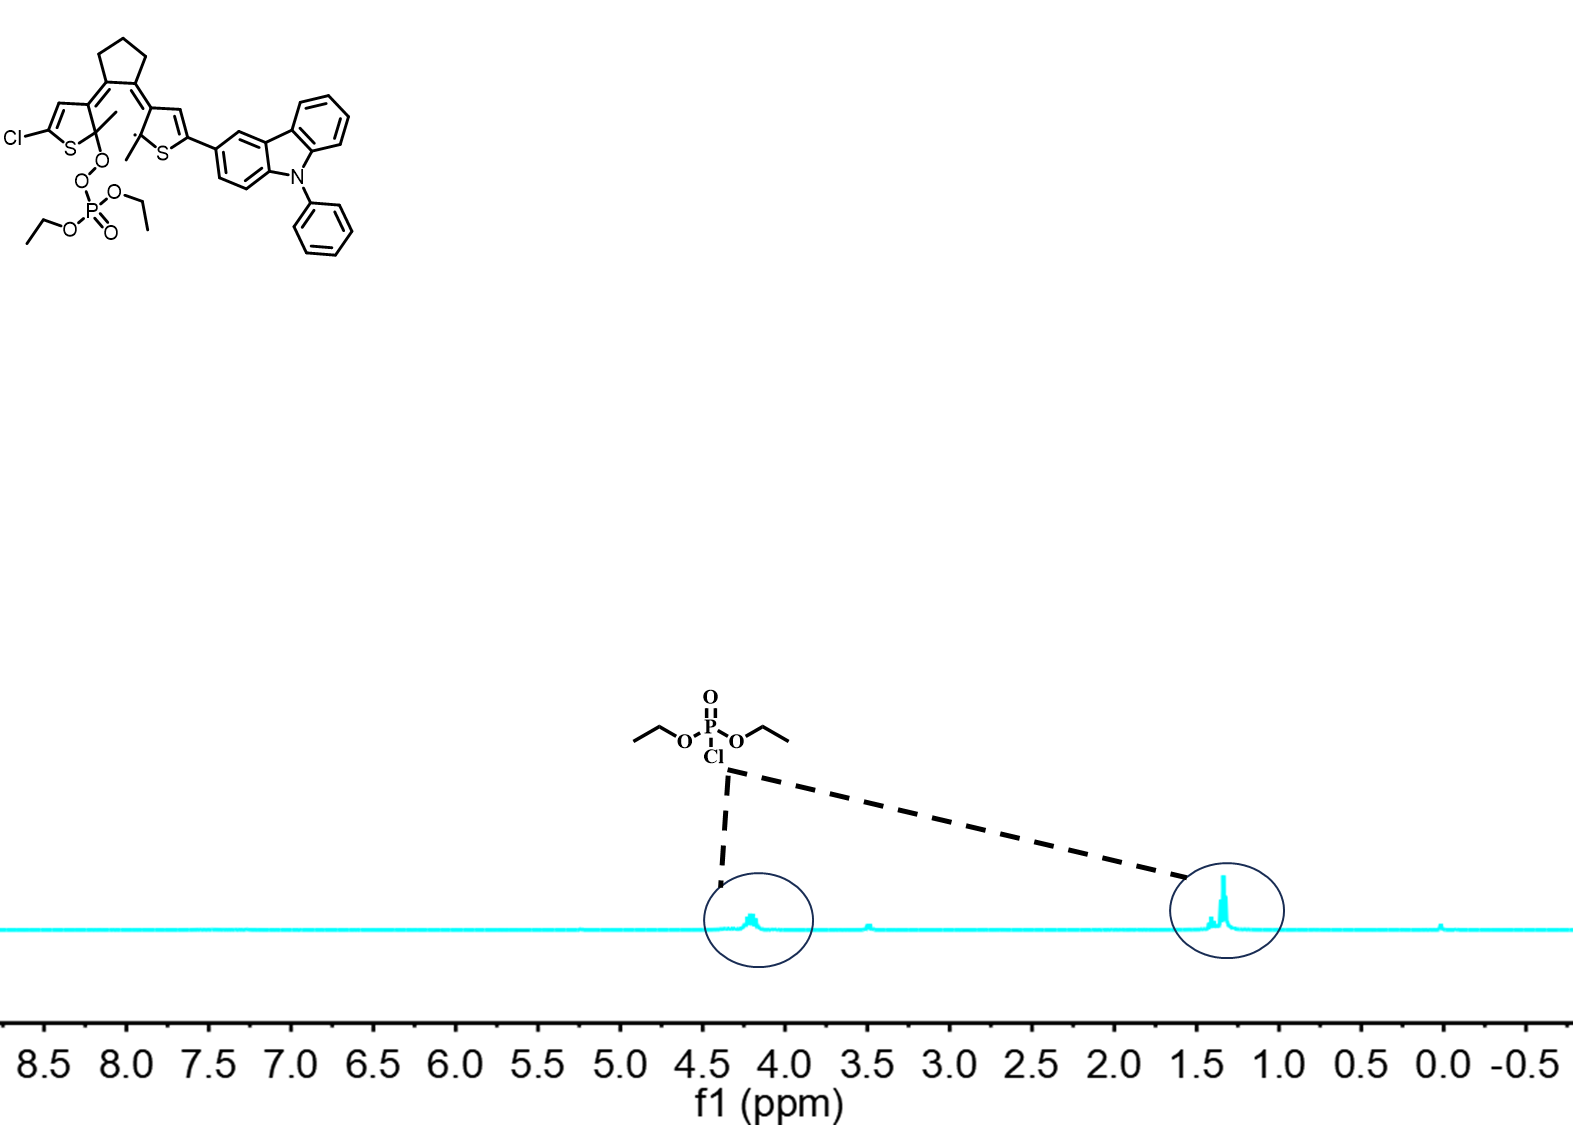


**Supplementary Fig. 21** 1H NMR of DTE-3PCz in CDCl3 solution under UV irradiation after addition of 10 equiv. of DCP.


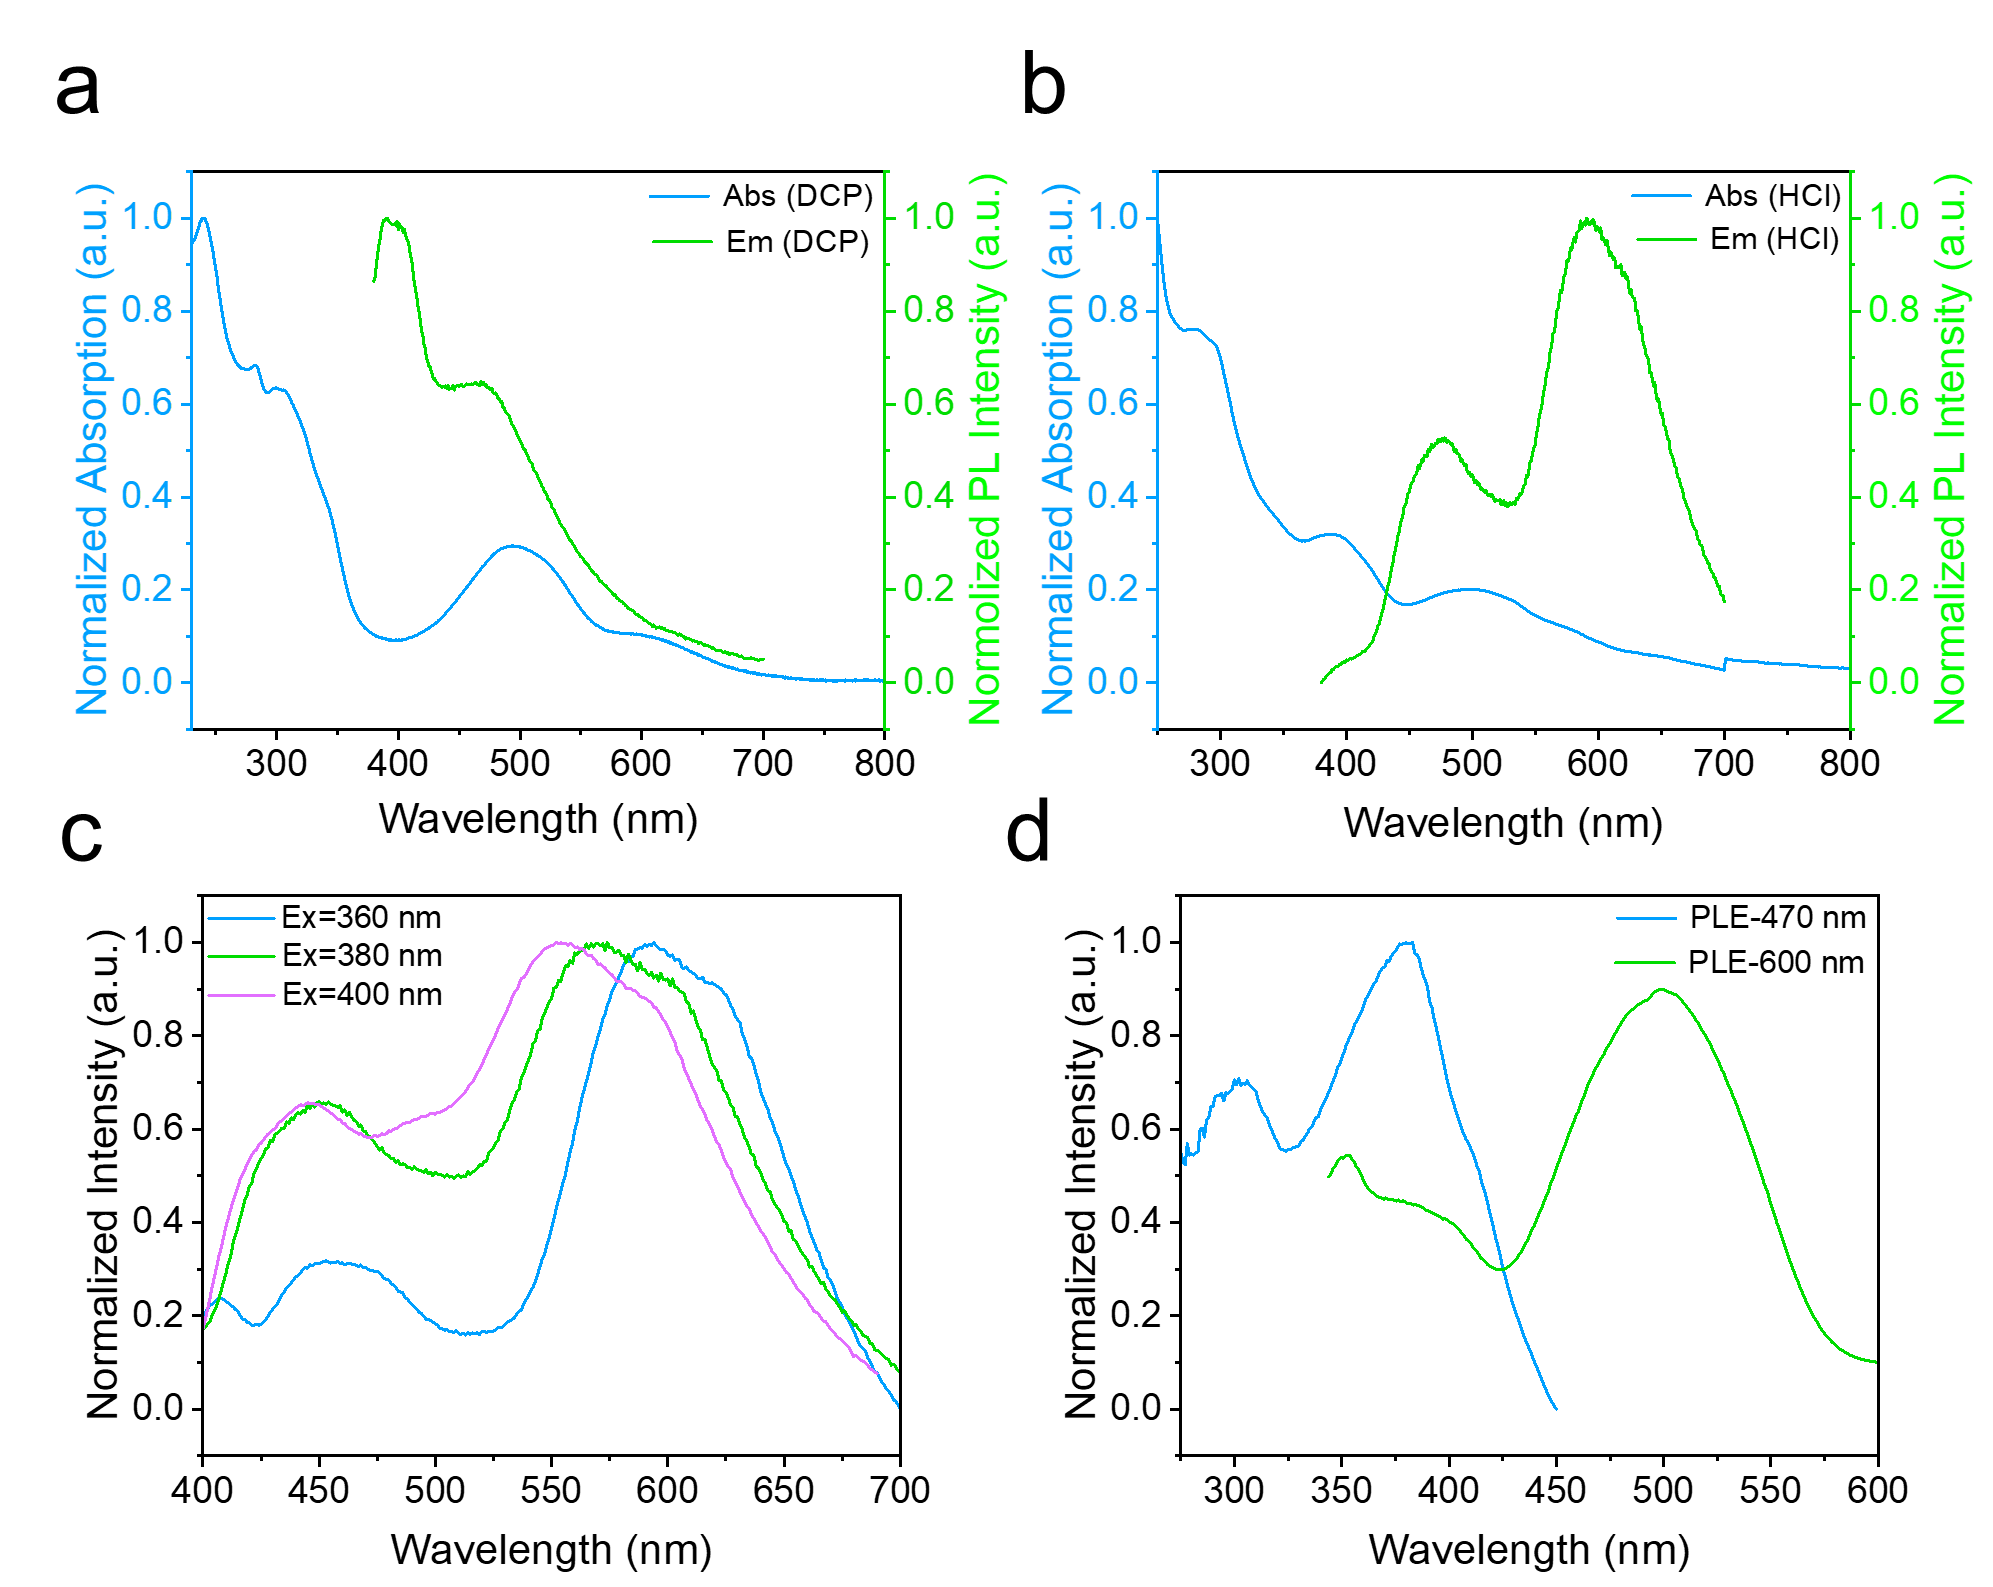


**Supplementary Fig. 22** Normalized absorption (blue line) and PL spectra (green line) of DTE-3PCz (1.0×10-5 M in DCM) upon addition of DCP (a) and HCl (b). Normalized PL spectra of DTE-3PCz (c) at different excitation wavelengths and normalized excitation spectra of DTE-3PCz (d) at different emission wavelengths.


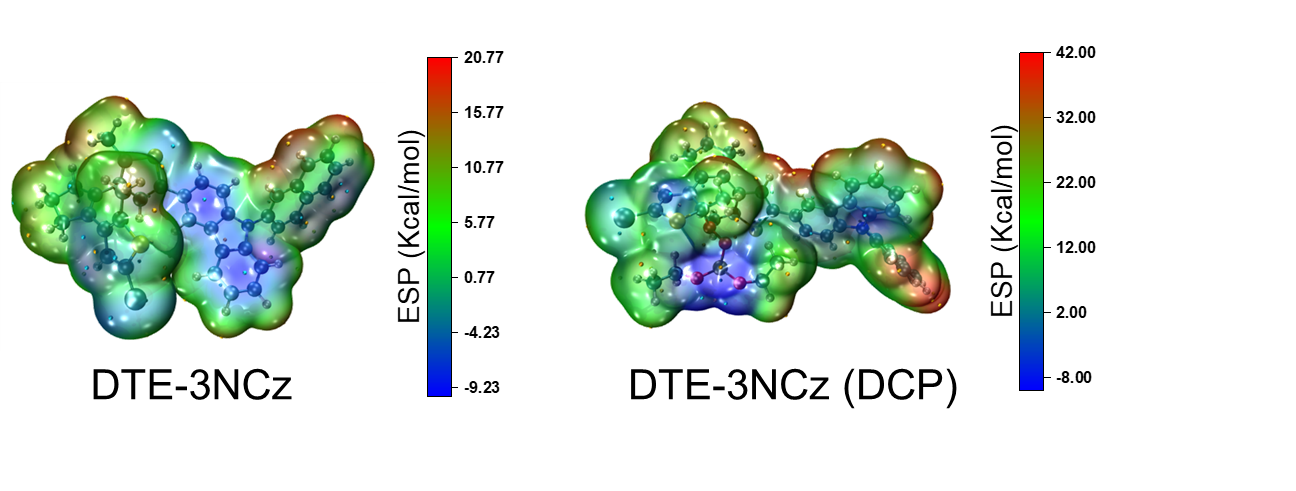


**Supplementary Fig. 23** ESP plots of DTE-3NCz before and after addition of DCP.


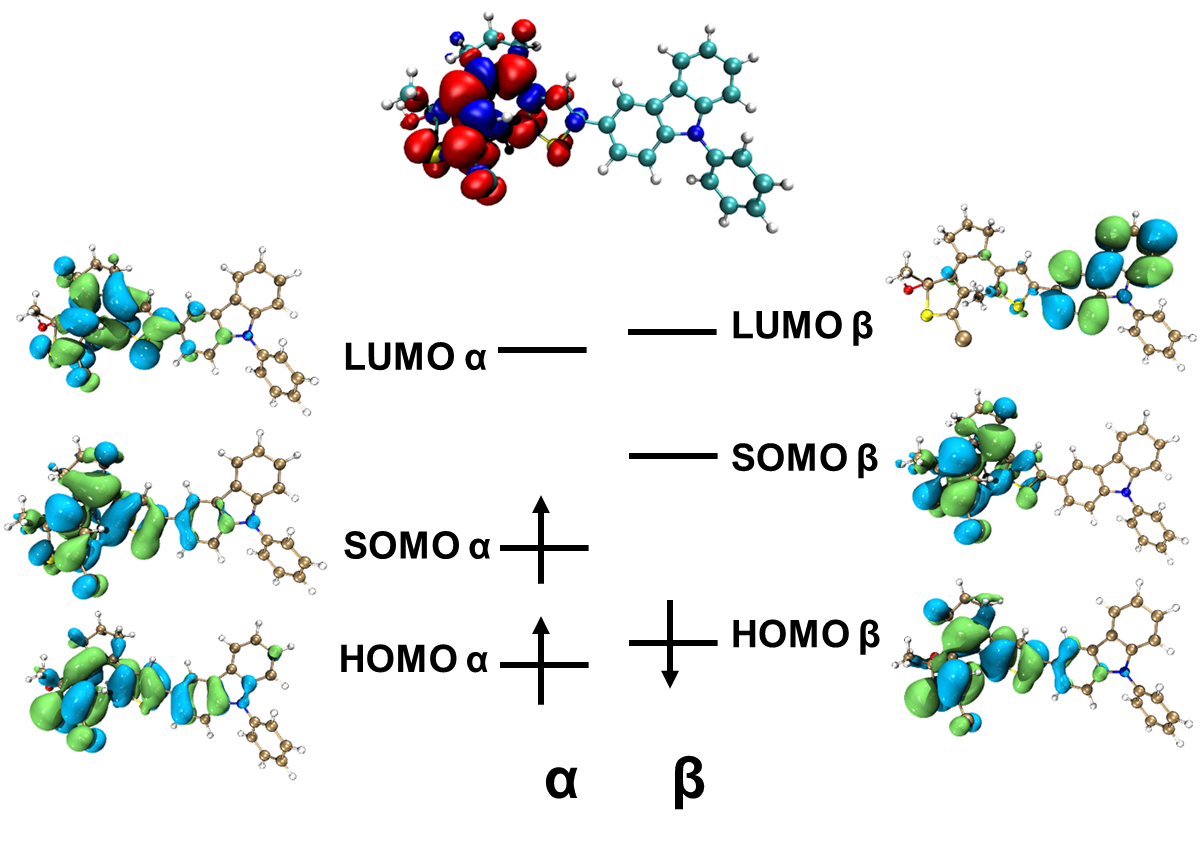


**Supplementary Fig. 24** Electronic spin density distributions (up), electronic density distributions of the frontier molecular orbitals (down) of DTE-3PCz radical (HCl) calculated at the theoretical level of uM062X/6-31 g(d, p).


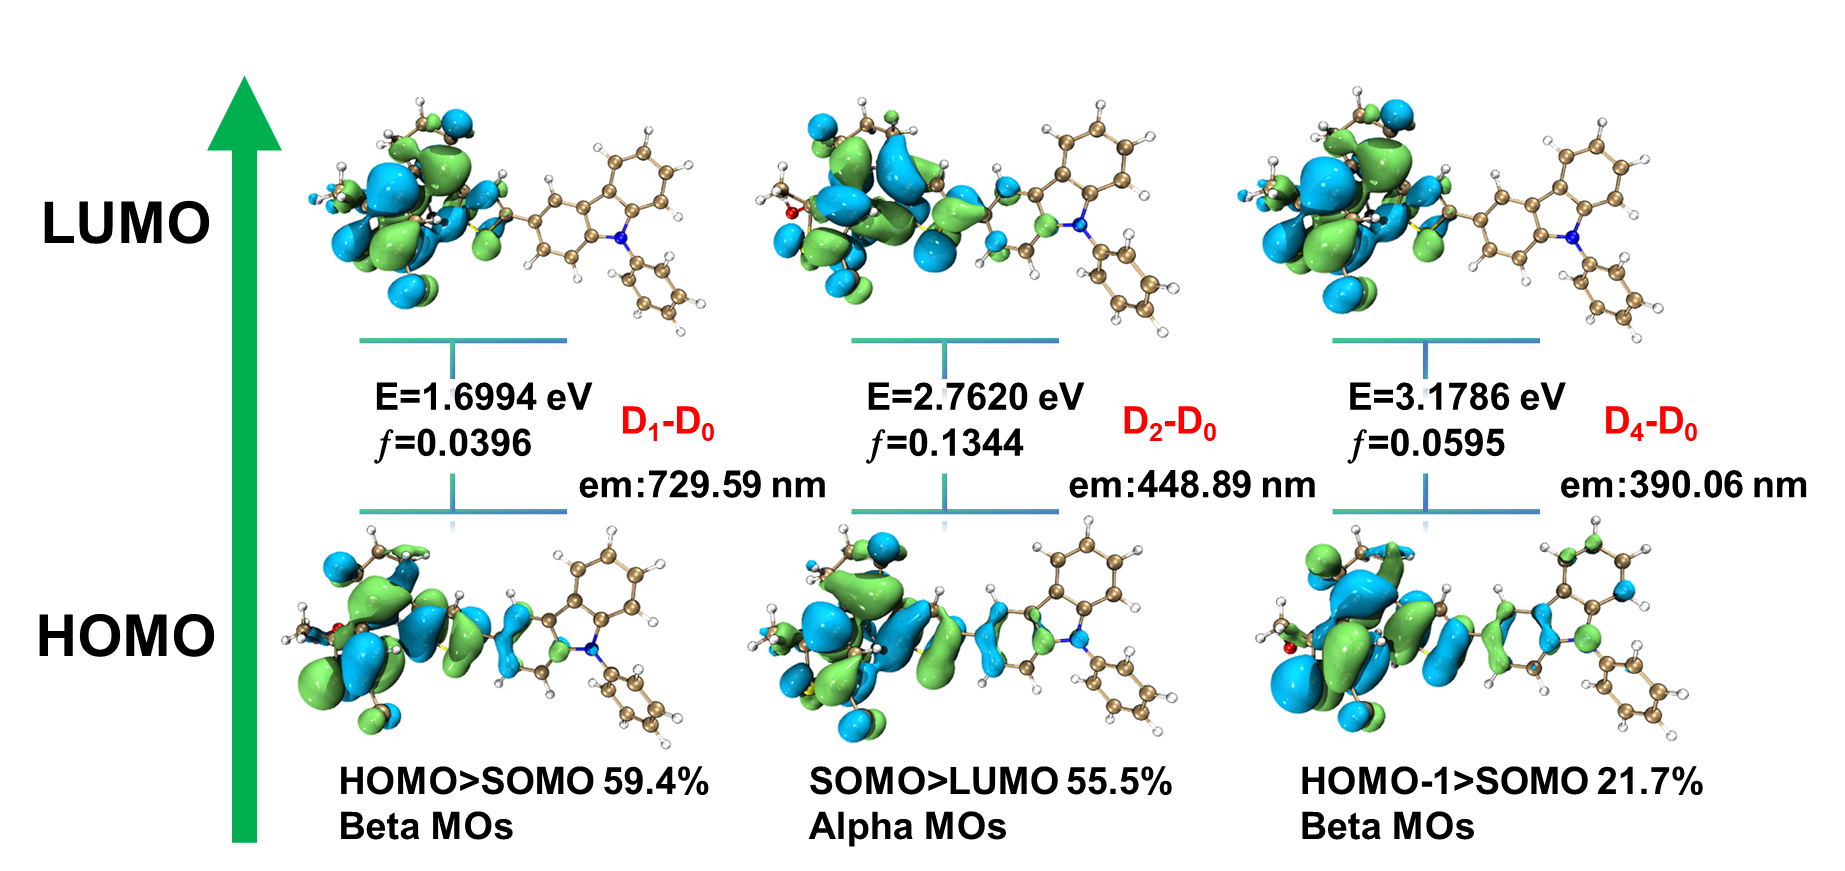


**Supplementary Fig. 25** Orbital transitions and electron-hole distribution corresponding to the DTE-3PCz radical (HCl).


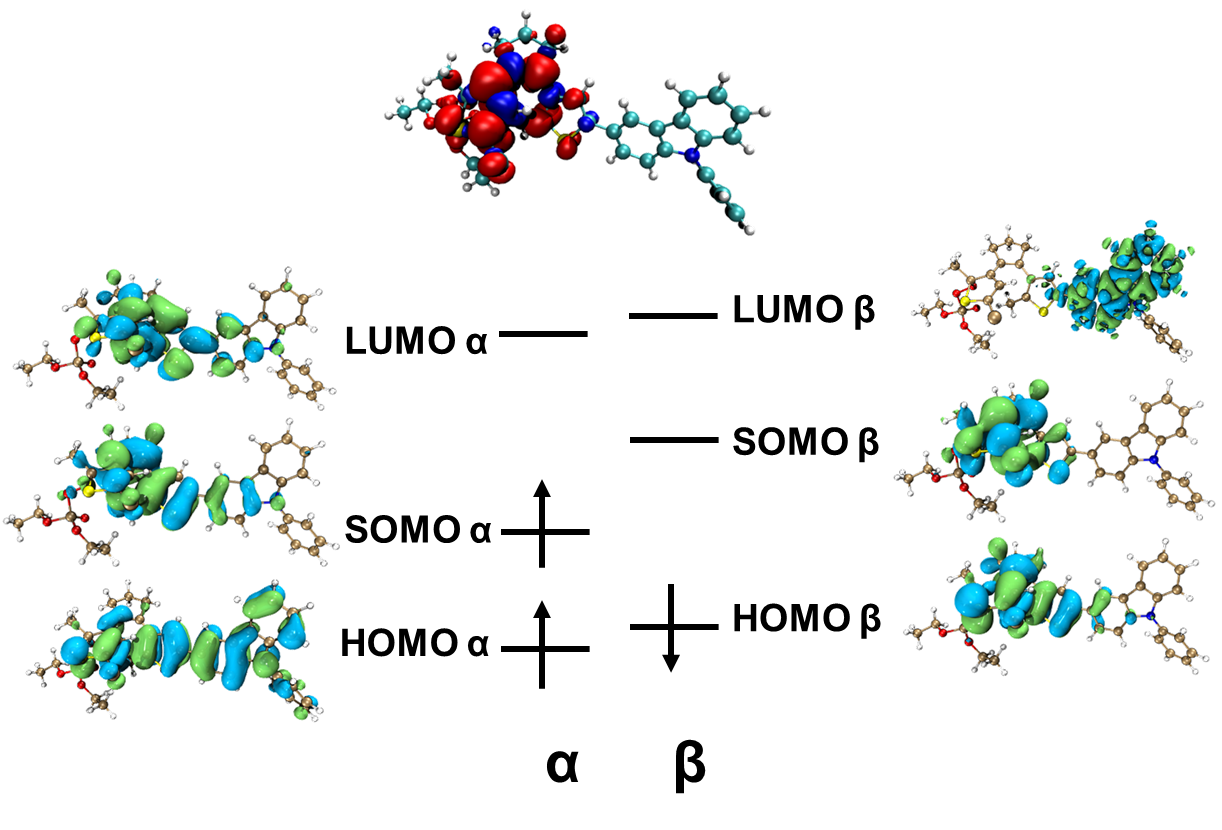


**Supplementary Fig. 26** Electronic spin density distributions (up), electronic density distributions of the frontier molecular orbitals (down) of DTE-3PCz radical (DCP) calculated at the theoretical level of uM062X/6-31 g(d, p).


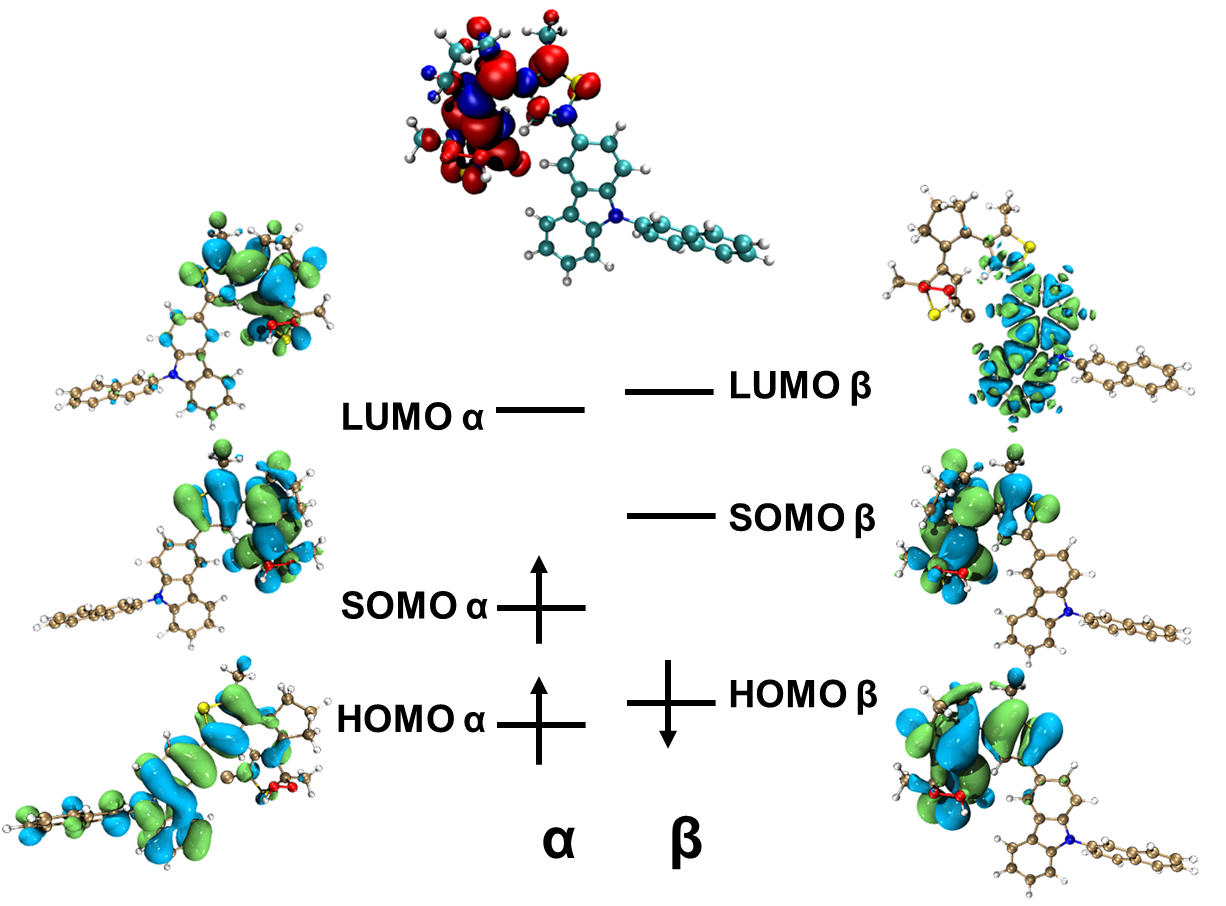


**Supplementary Fig. 27** Electronic spin density distributions (up), electronic density distributions of the frontier molecular orbitals (down) of DTE-3NCz radical (HCl) calculated at the theoretical level of uM062X/6-31 g(d, p).


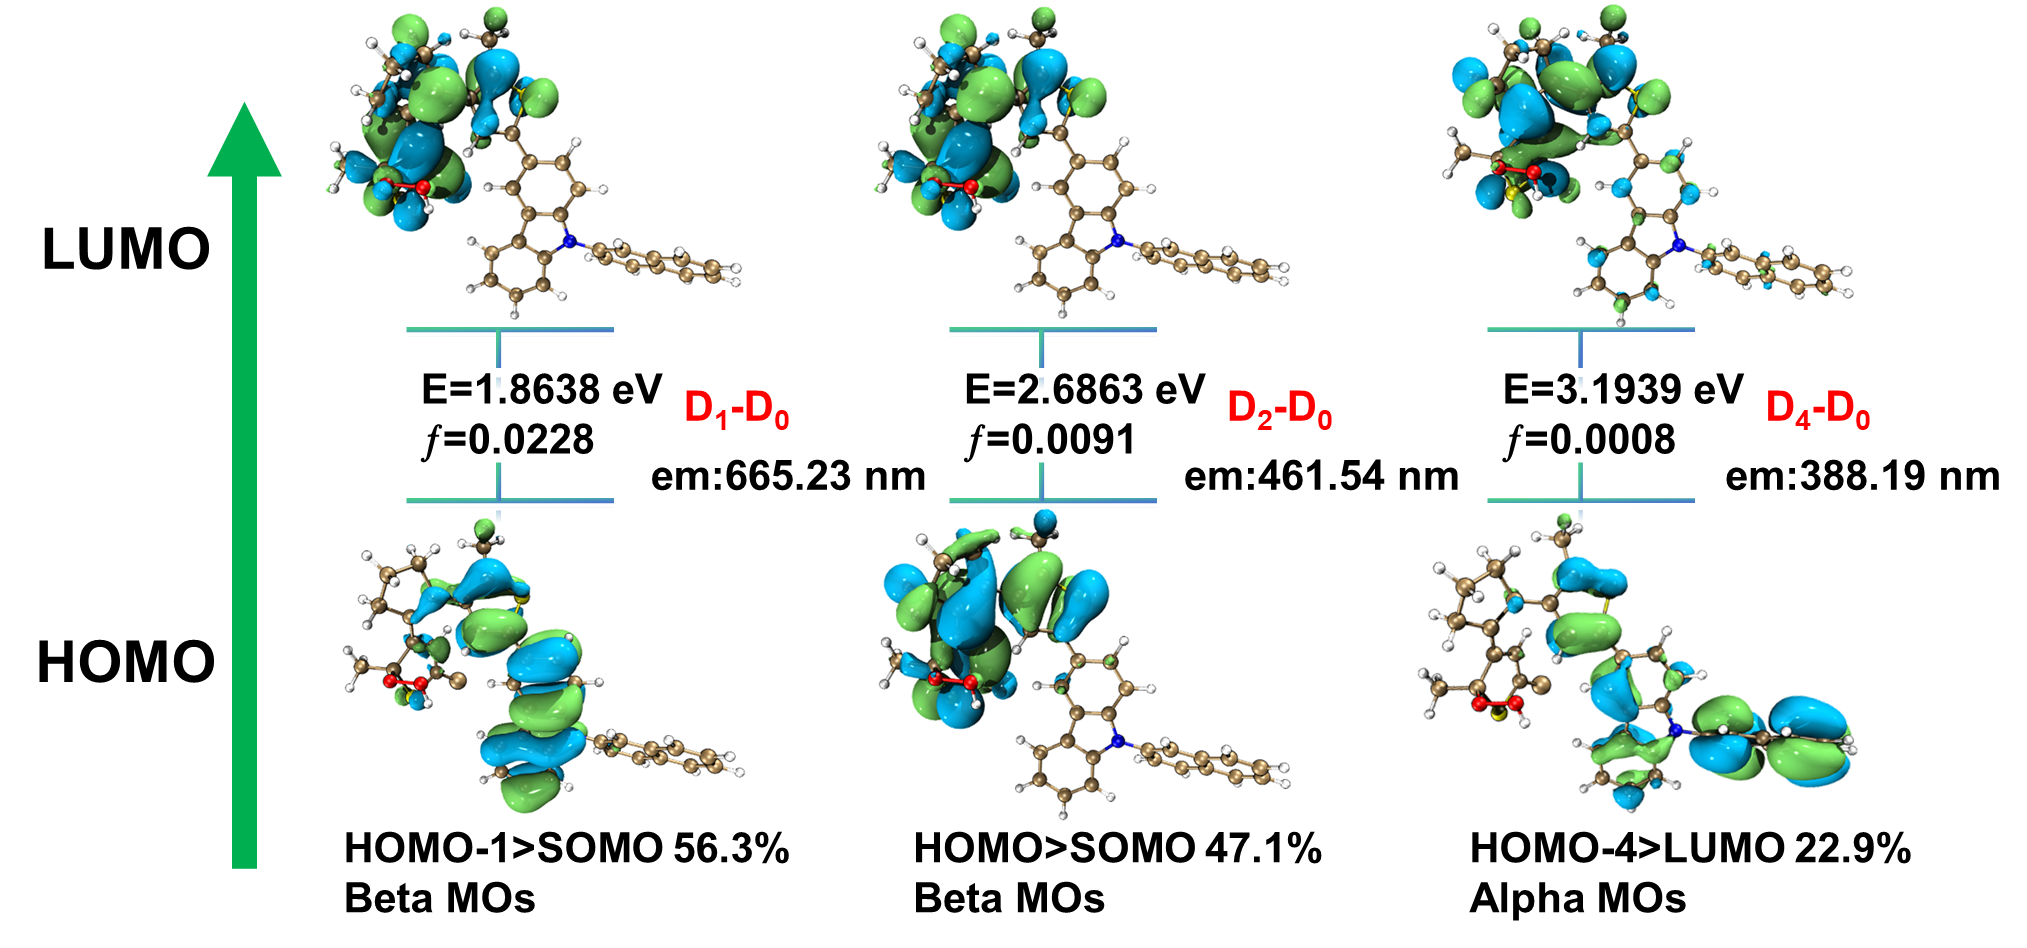


**Supplementary Fig. 28** Orbital transitions and electron-hole distribution corresponding to the DTE-3NCz radical (HCl).


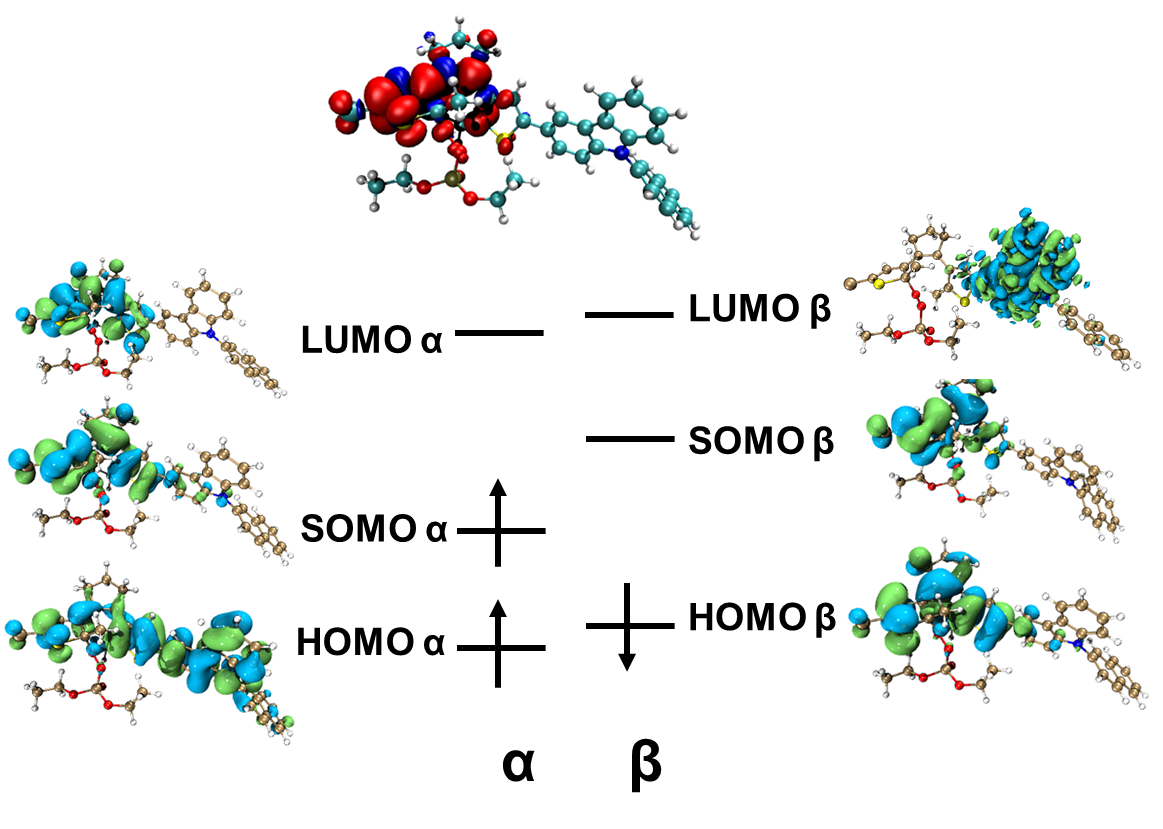


**Supplementary Fig. 29** Electronic spin density distributions (up), electronic density distributions of the frontier molecular orbitals (down) of DTE-3NCz radical (DCP) calculated at the theoretical level of uM062X/6-31 g(d, p).


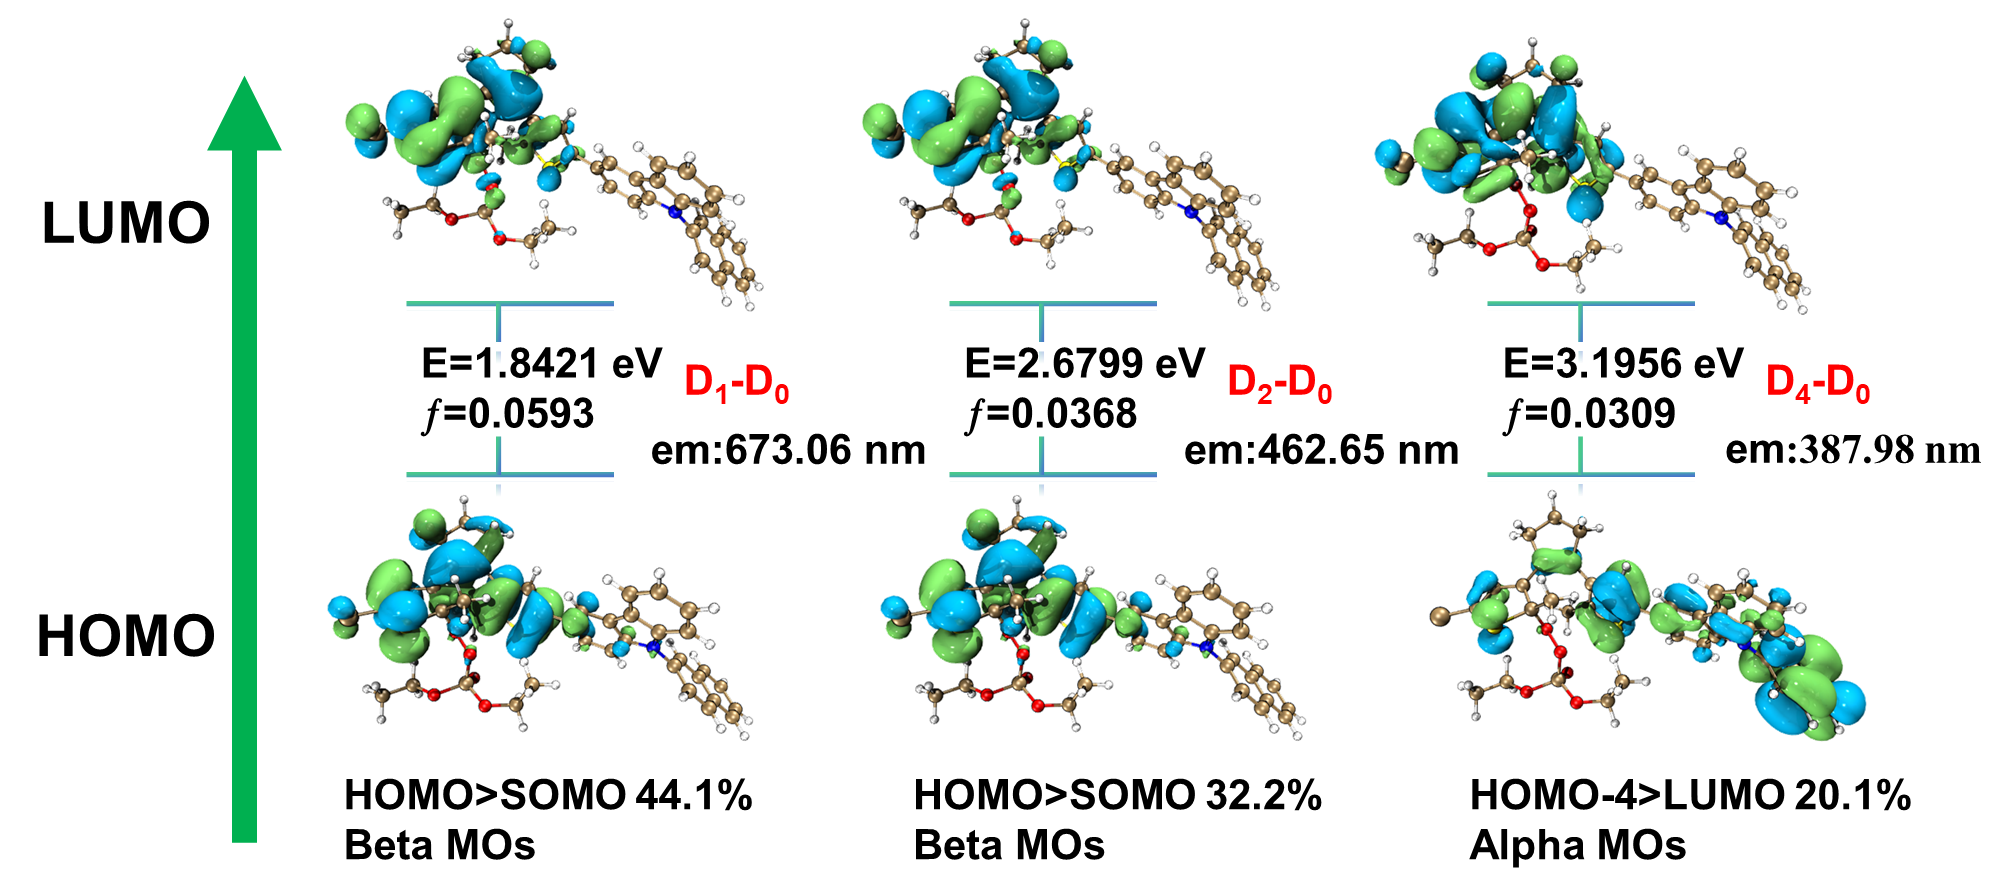


**Supplementary Fig. 30** Orbital transitions and electron-hole distribution corresponding to the DTE-3NCz radical (DCP).


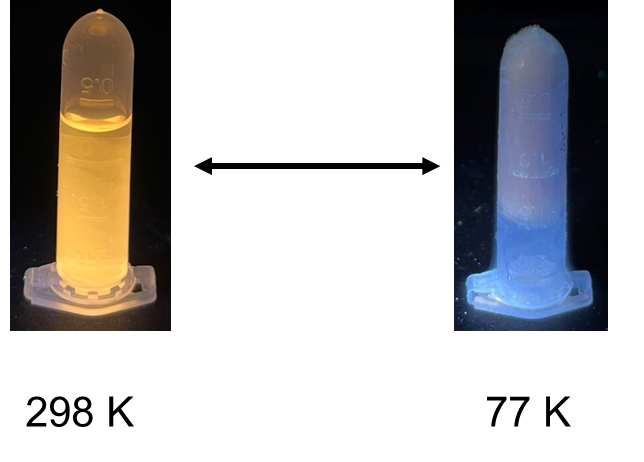


**Supplementary Fig. 31** The photographs of DTE-3PCz (1.0×10-5 M in DCM) placed at 298 K and 77 K.


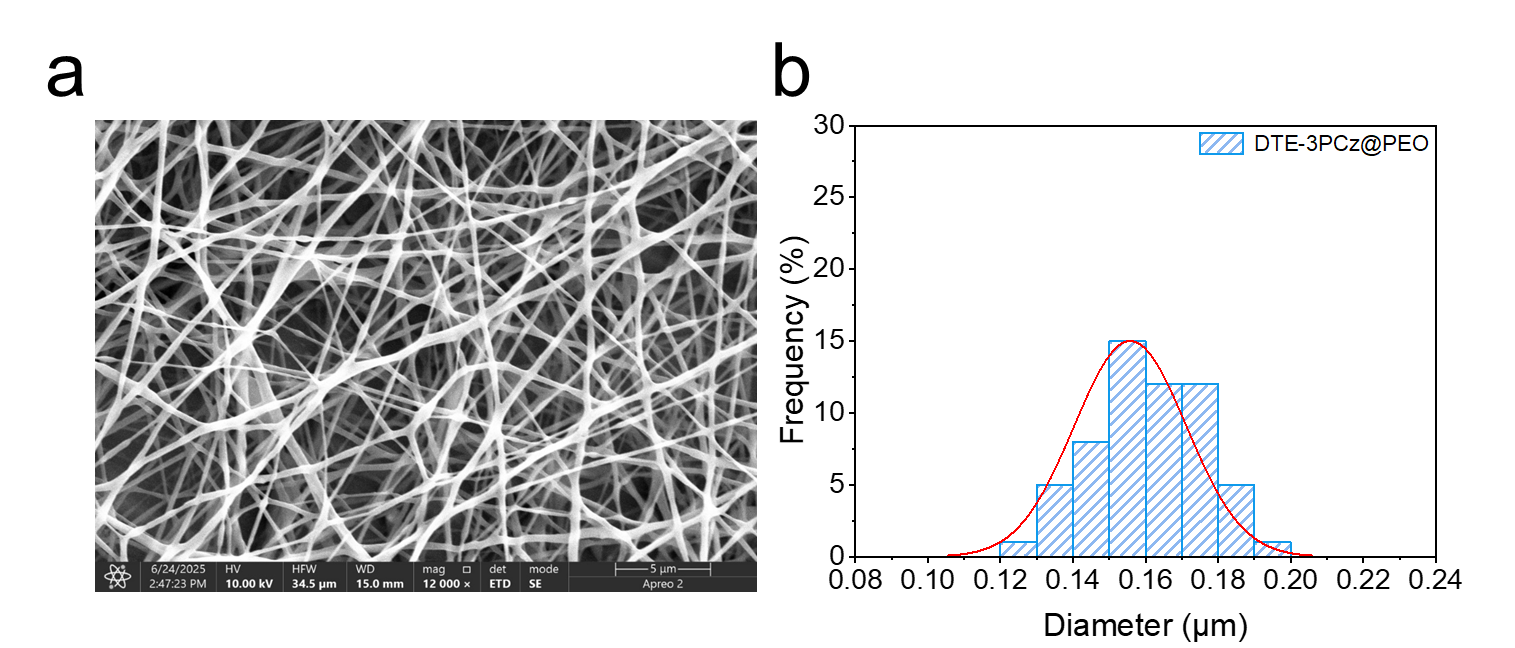


**Supplementary Fig. 32** Scanning electron microscope image of DTE-3PCz film.


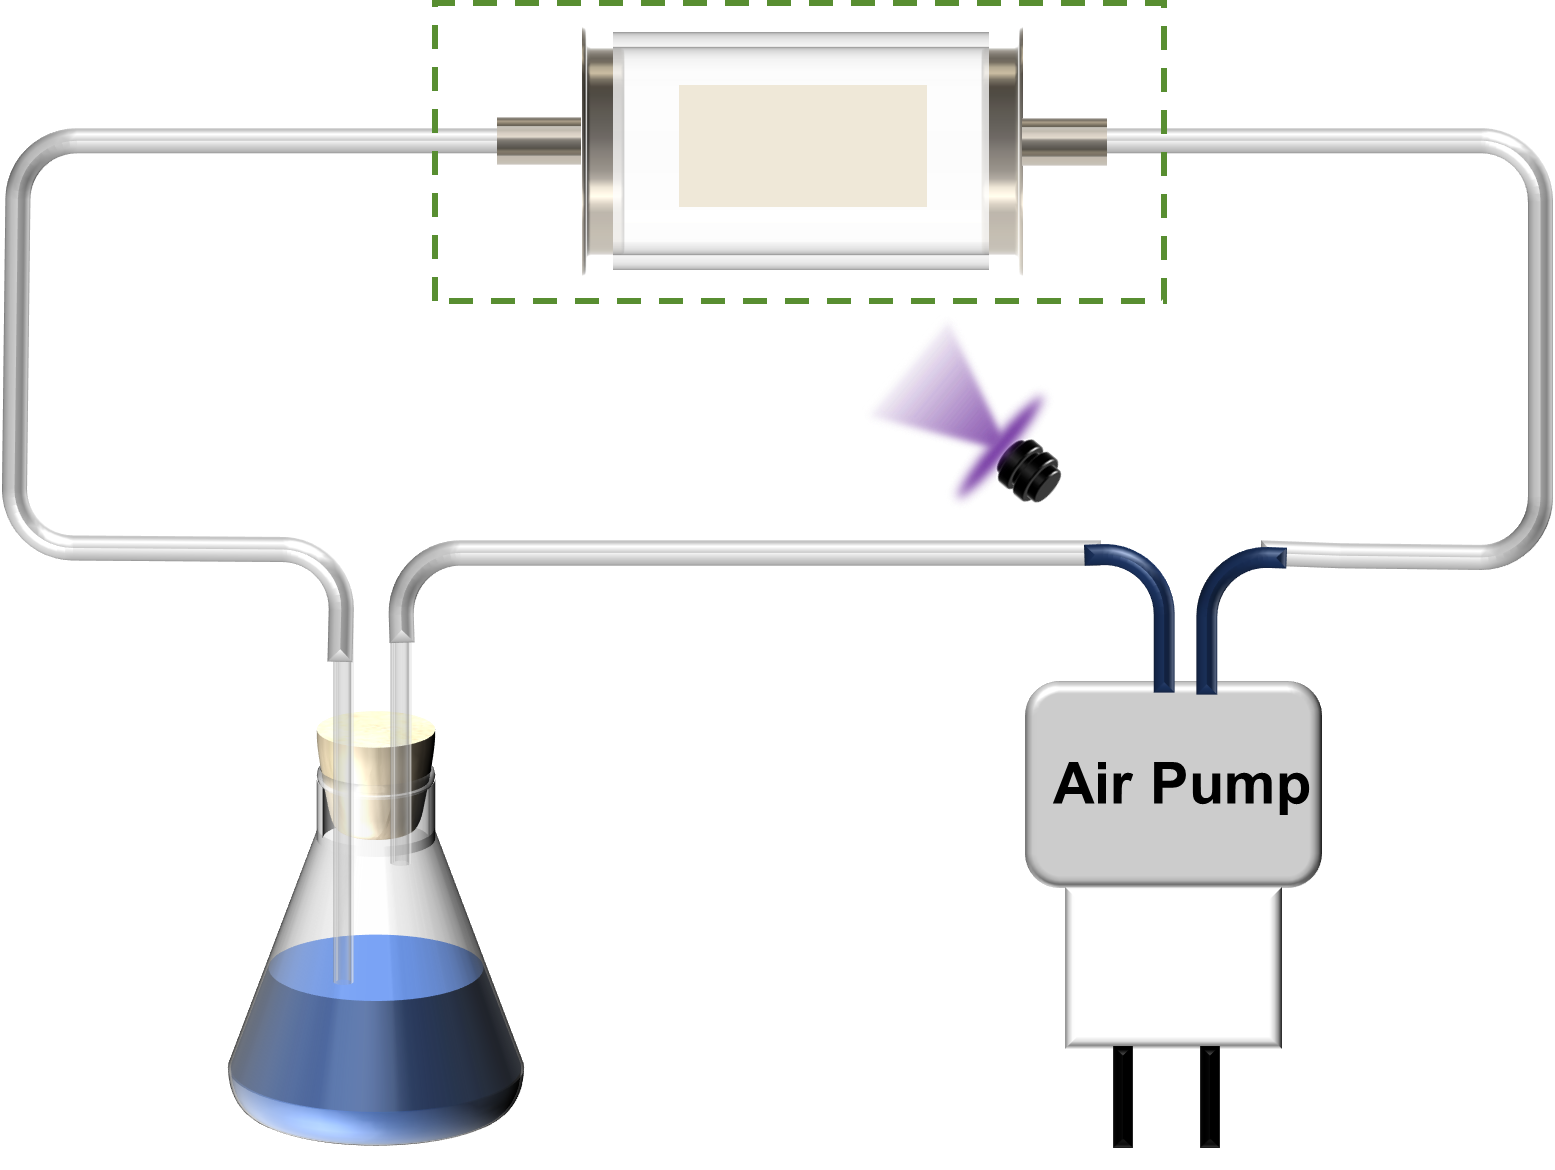


**Supplementary Fig. 33** Schematic diagram of the adsorption testing system for DTE-3PCz films. The section enclosed by dashed lines can be removed for weighing.


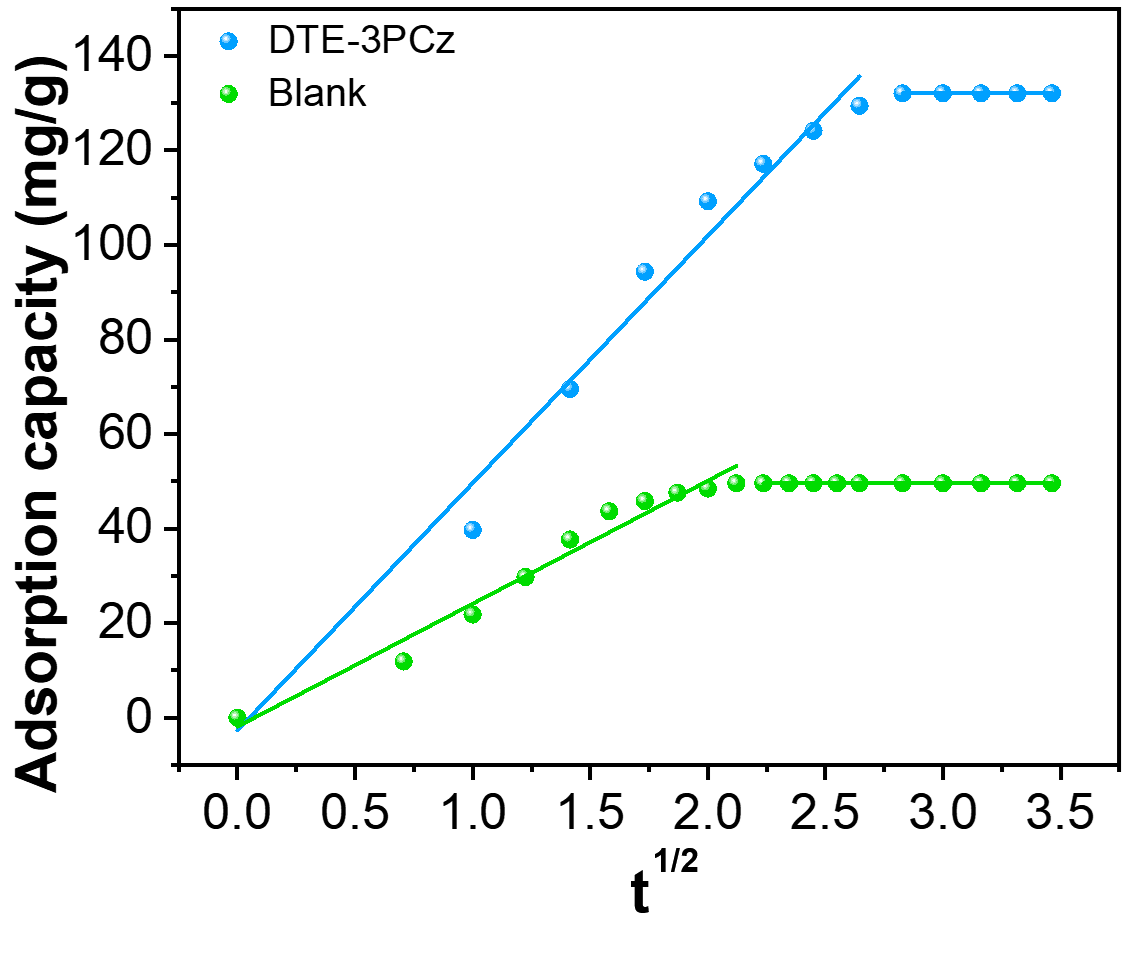


**Supplementary Fig. 34** Particle diffusion model.


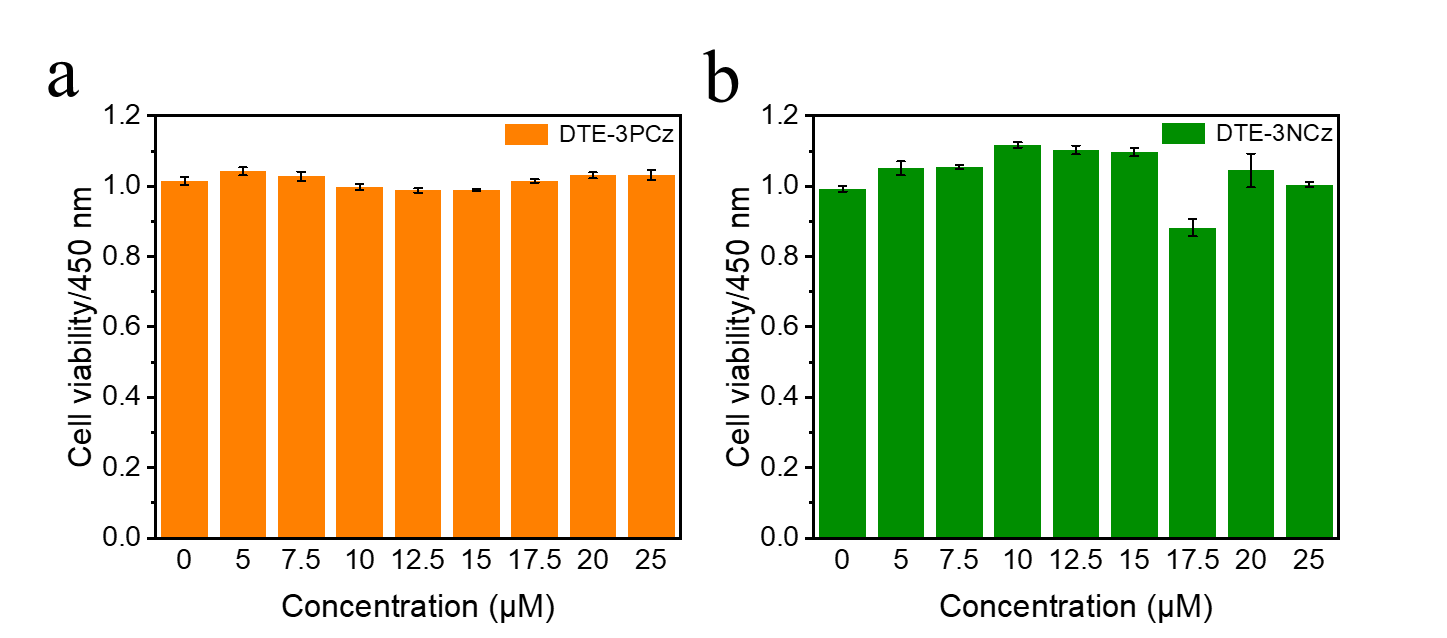


**Supplementary Fig. 35** Cell viability by WST-8 method.

Supplementary Tables

**Supplementary Table 1** Luminescence performance data of DTE-3PCz (1.0×10-5 M) in original, DCP, HCl, 2-CEES and BTC DCM (1.0×10-5 M) solution.

|  | **λex (nm)** | **λem (max) (nm)** | **ΦPL (%)** |
| --- | --- | --- | --- |
| **DTE-3PCz** | 365 | 400 | 6.92 |
| **DTE-3PCz (HCl)** | 365 | 621 | 3.89 |
| **DTE-3PCz (BTC)** | 365 | 619 | 1.4 |
| **DTE-3PCz (2-CEES)** | 365 | 600 | 0.38 |
| **DTE-3PCz (DCP)** | 365 | 465 | 0.04 |

**Supplementary Table 2** Calculated wavelength (λ) and oscillator strength (ƒ) for absorption of DTE-3PCz (HCl) radical with uM062X functional at the basis set level of 6-31 g(d, p).

| **Excited state** | **E (eV)** | **λ (nm)** | **ƒ** |
| --- | --- | --- | --- |
| **1** | 2.3143 | 535.75 | 0.0385 |
| **2** | 3.1709 | 391.01 | 0.1348 |
| **3** | 3.1836 | 389.45 | 0.0152 |
| **4** | 3.4332 | 361.14 | 0.1158 |

**Supplementary Table 3** Calculated wavelength (λ) and oscillator strength (ƒ) for absorption of DTE-3PCz (DCP) radical with uM062X functional at the basis set level of 6-31 g(d, p).

| **Excited state** | **E (eV)** | **λ (nm)** | **ƒ** |
| --- | --- | --- | --- |
| **1** | 2.2938 | 540.52 | 0.0420 |
| **2** | 3.0962 | 400.44 | 0.0153 |
| **3** | 3.2003 | 387.41 | 0.0405 |
| **4** | 3.4094 | 363.66 | 0.0970 |
